# Supplementary material
Source: PubMed Central journal article supplement (PMC3171281)

Supplementary Figure 1. Quantile-quantile (Q-Q) plot for each control group versus all of the other control groups combined. Base 10 logarithms are used on each axis. The figures extend over 4 pages.

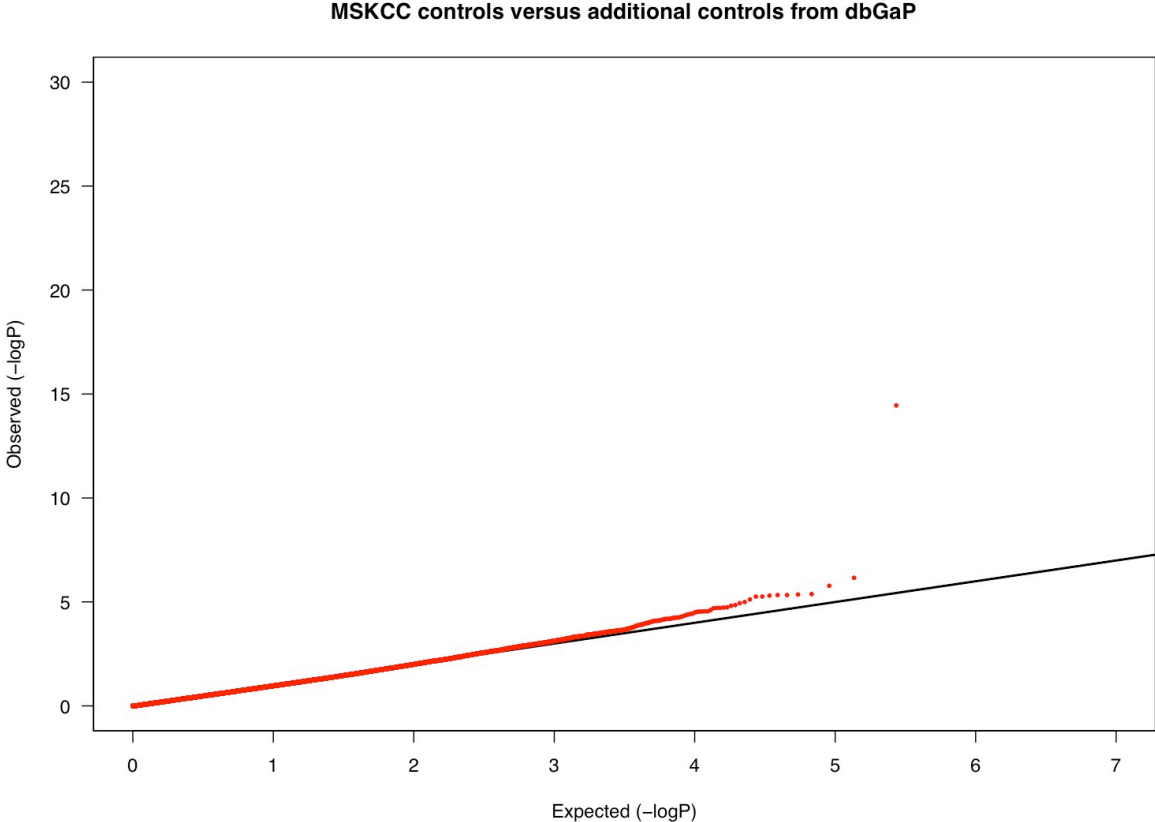

Cgems prostate controls compared to shared controls using genotype frequency

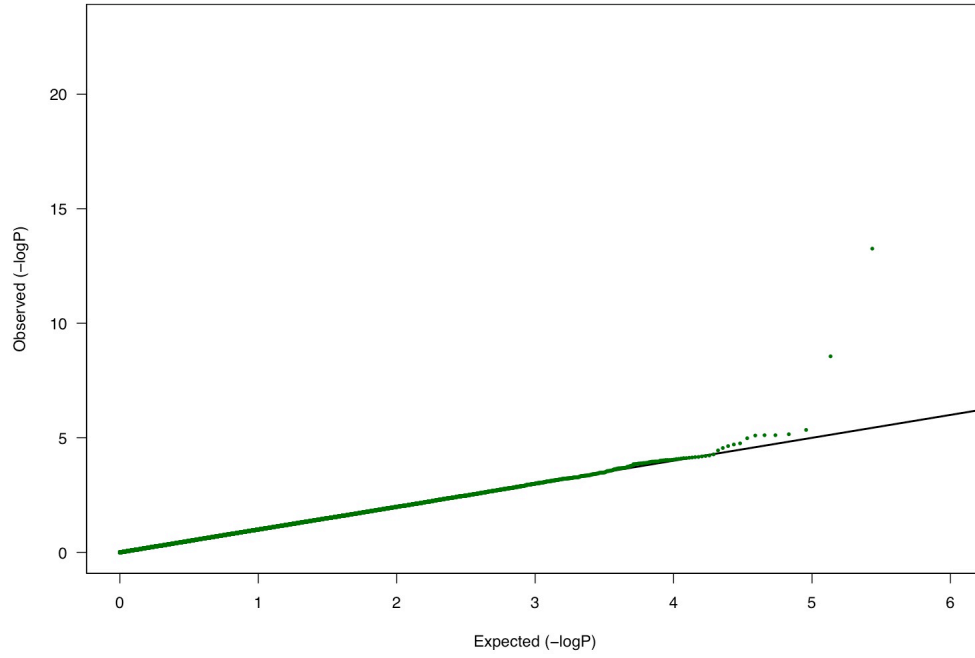

cgems breast controls compared to shared controls using genotype frequency

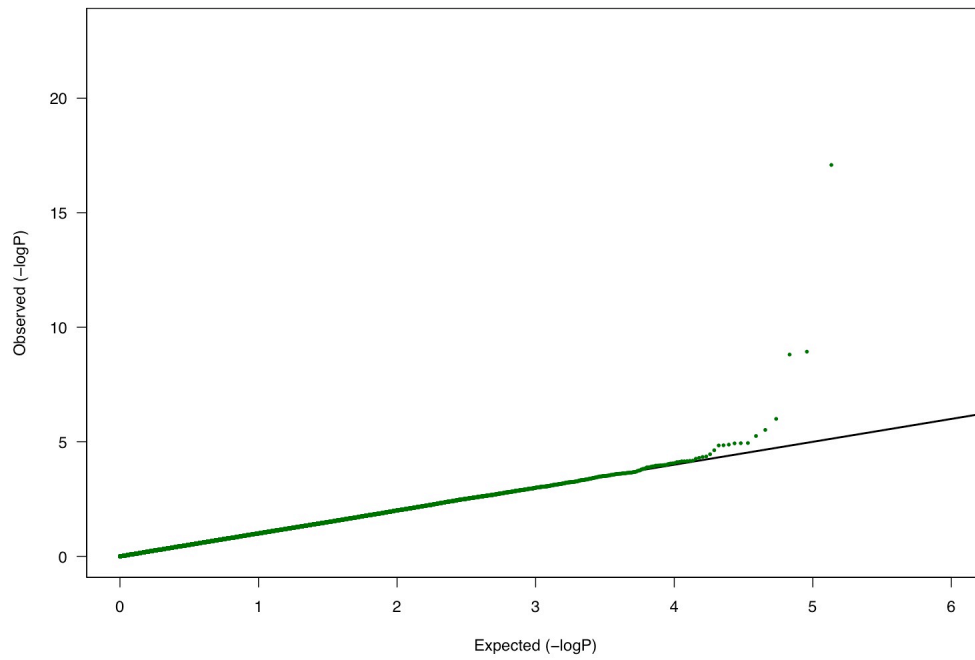

Lung controls compared to shared controls using genotype frequency

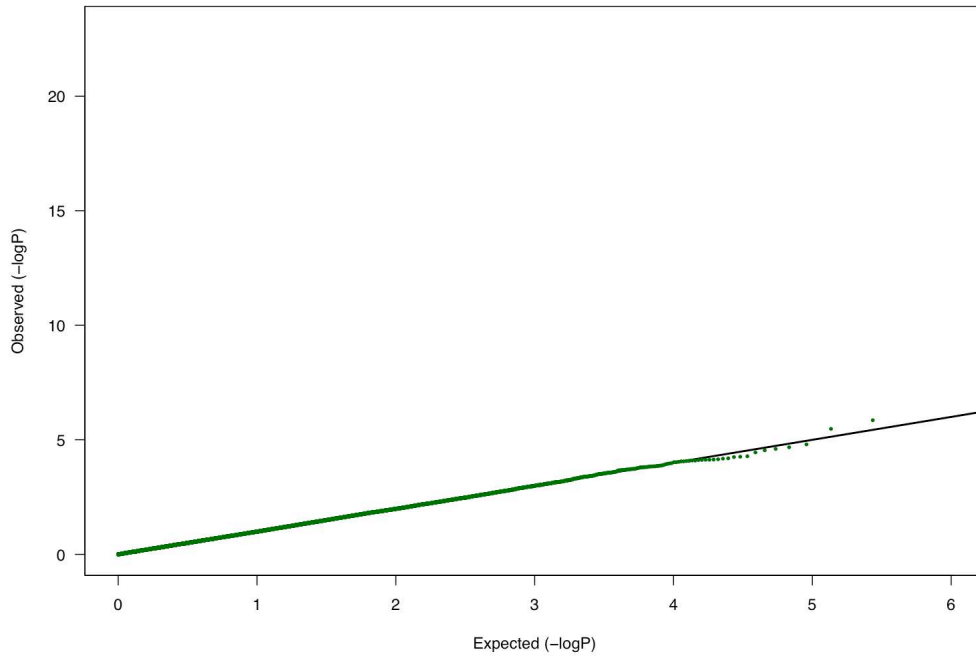

SAGE controls compared to shared controls using genotype frequency

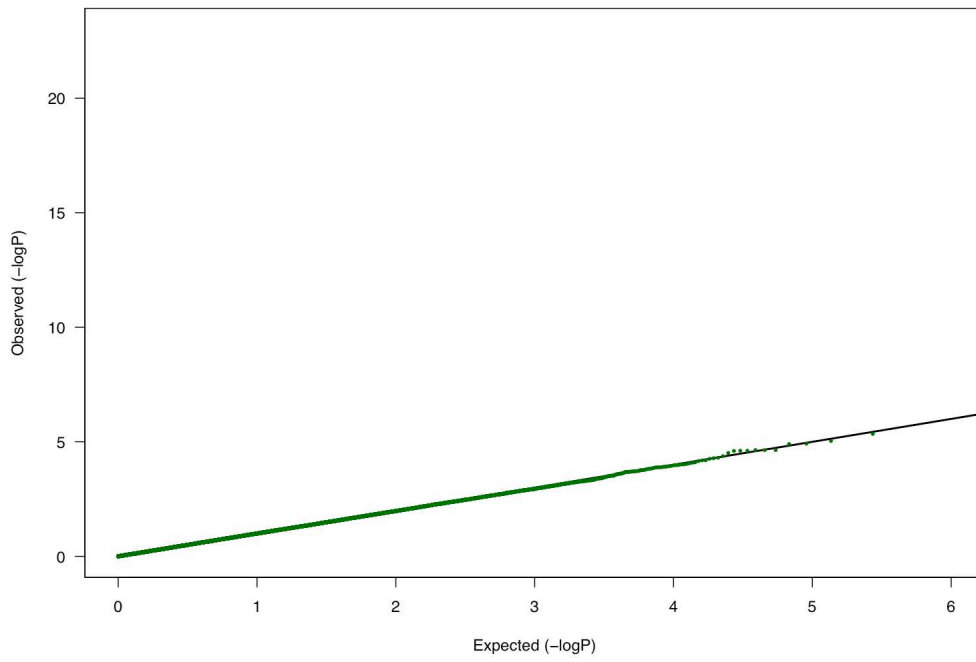

CIDR PD controls compared to shared controls using genotype frequency

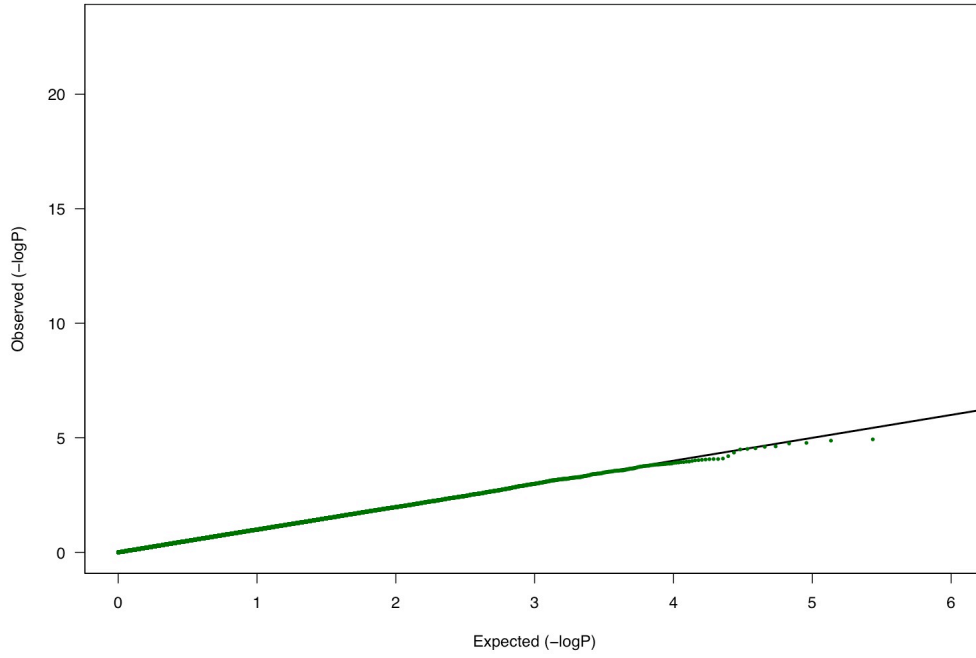

Irish controls compared to shared controls using genotype frequency

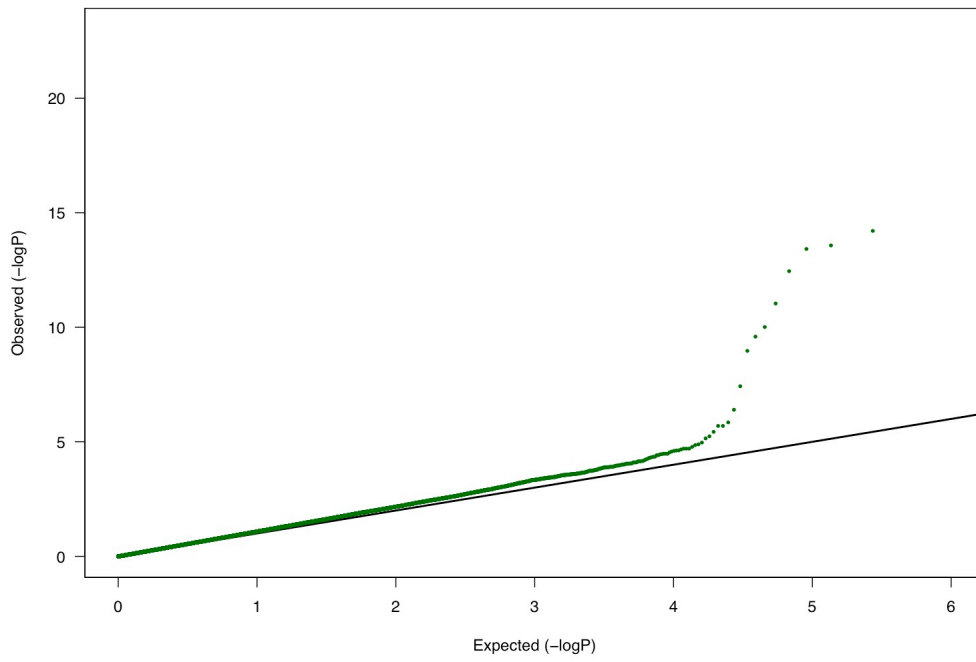

Supplement: hhe0072-0021-s01.pdf [file hhe0072-0021-s01.pdf]
