# Supplementary material
Source: PubMed Central journal article supplement (PMC3171281)

Supplementary Figure 2. Principal component analysis plot comparing pairs of eigenvectors for the top 20 principal components. Each individual is color-coded by sample source, as indicated in the Figures. All figures use the same coding.

Pancreatic cases with controls from Publics database  
PCA plot PC1vs PC2

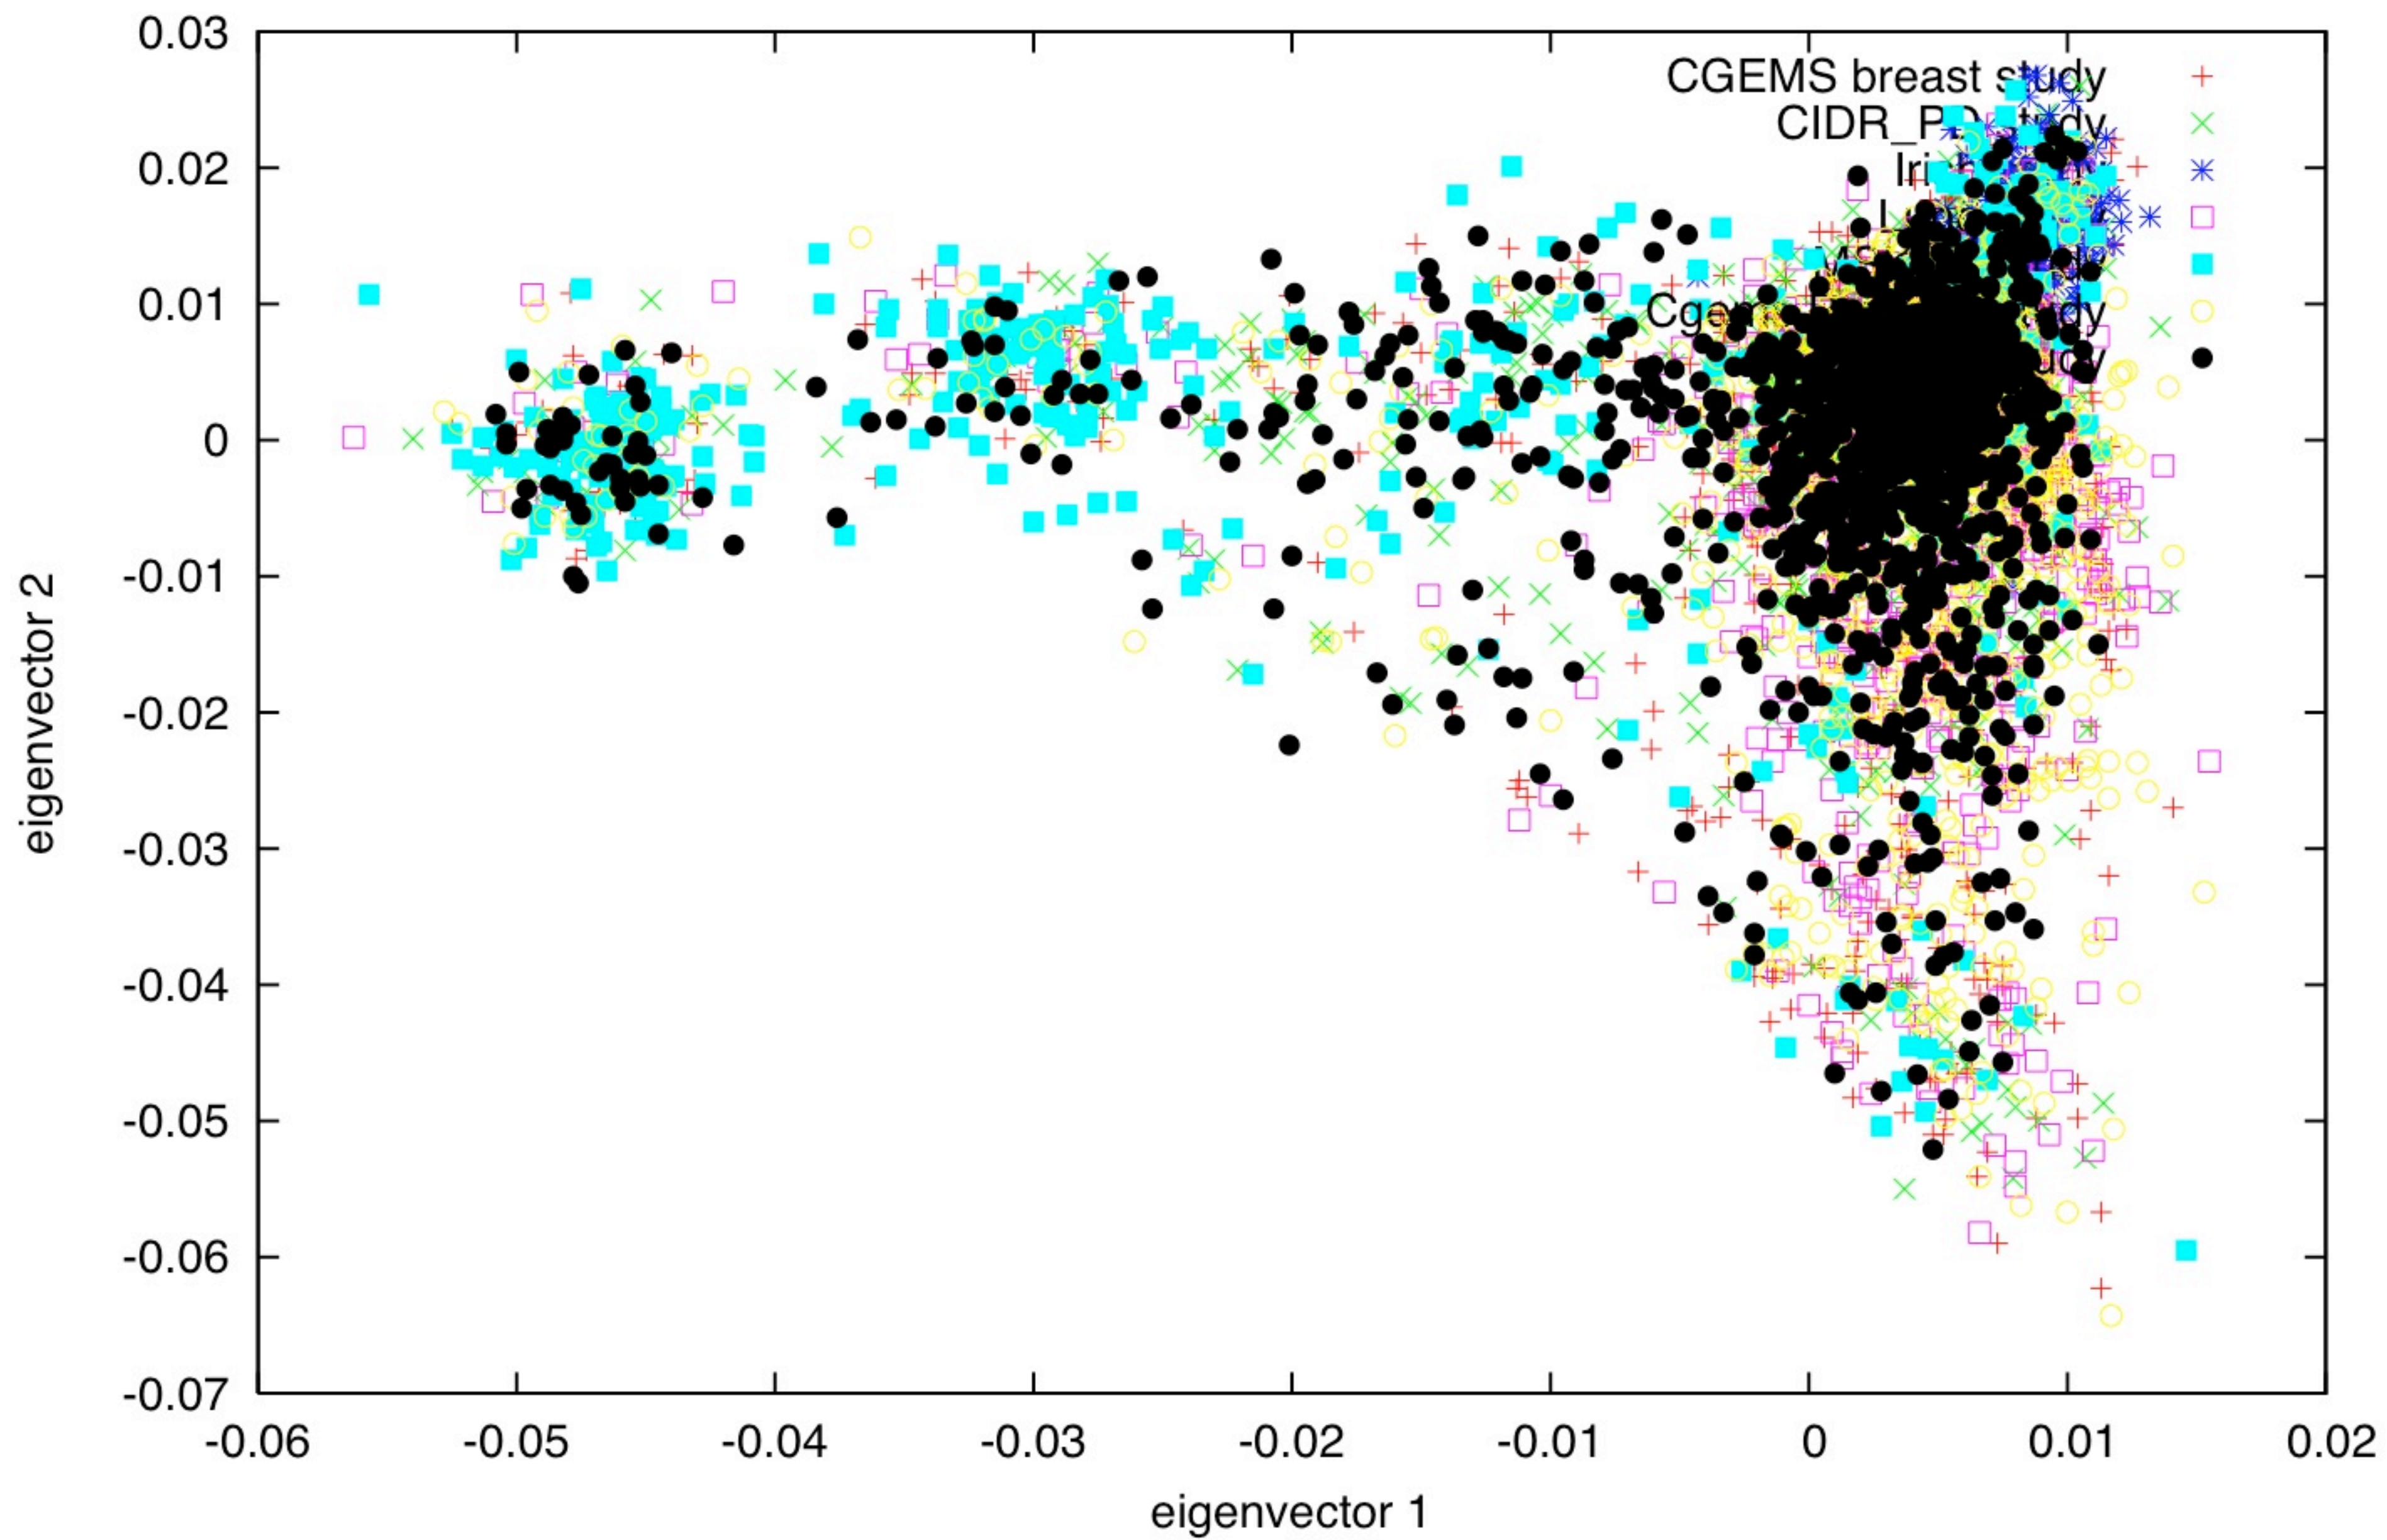



Pancreatic cases with controls from Publics database  
PCA plot: PC3 vs PC4

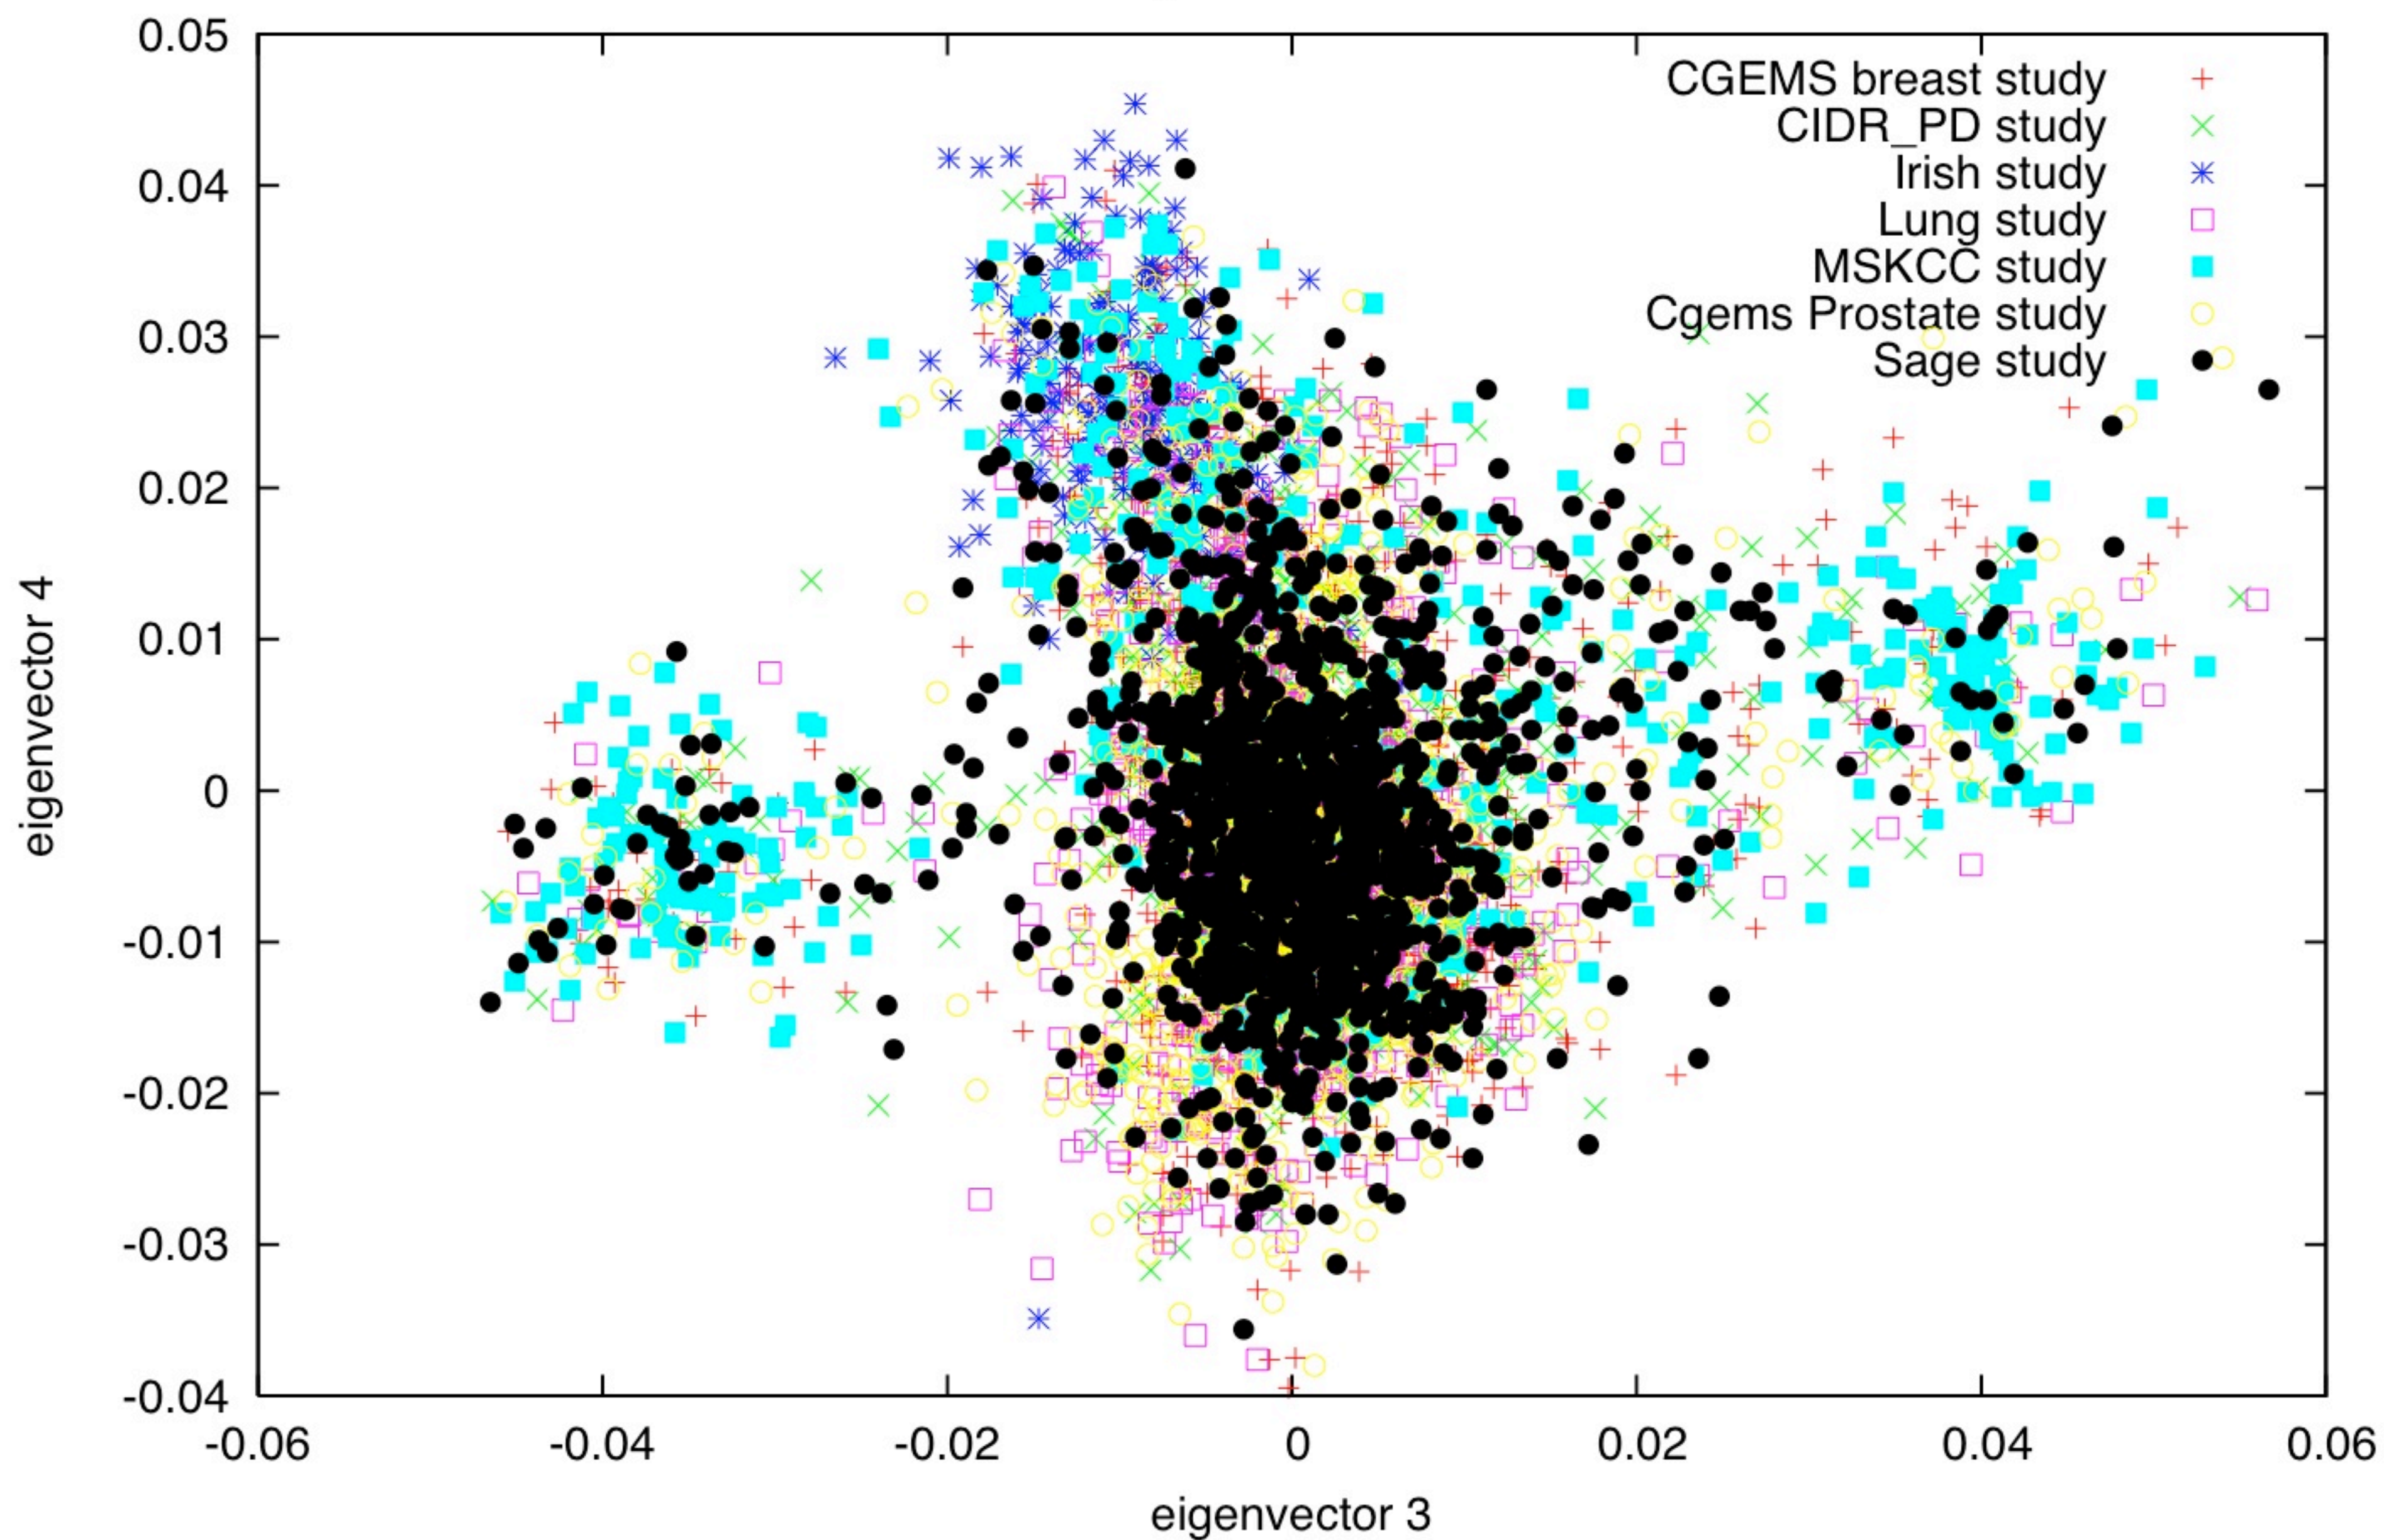



Pancreatic cases with controls from Publics database  
PCA plot: PC5 vs PC6

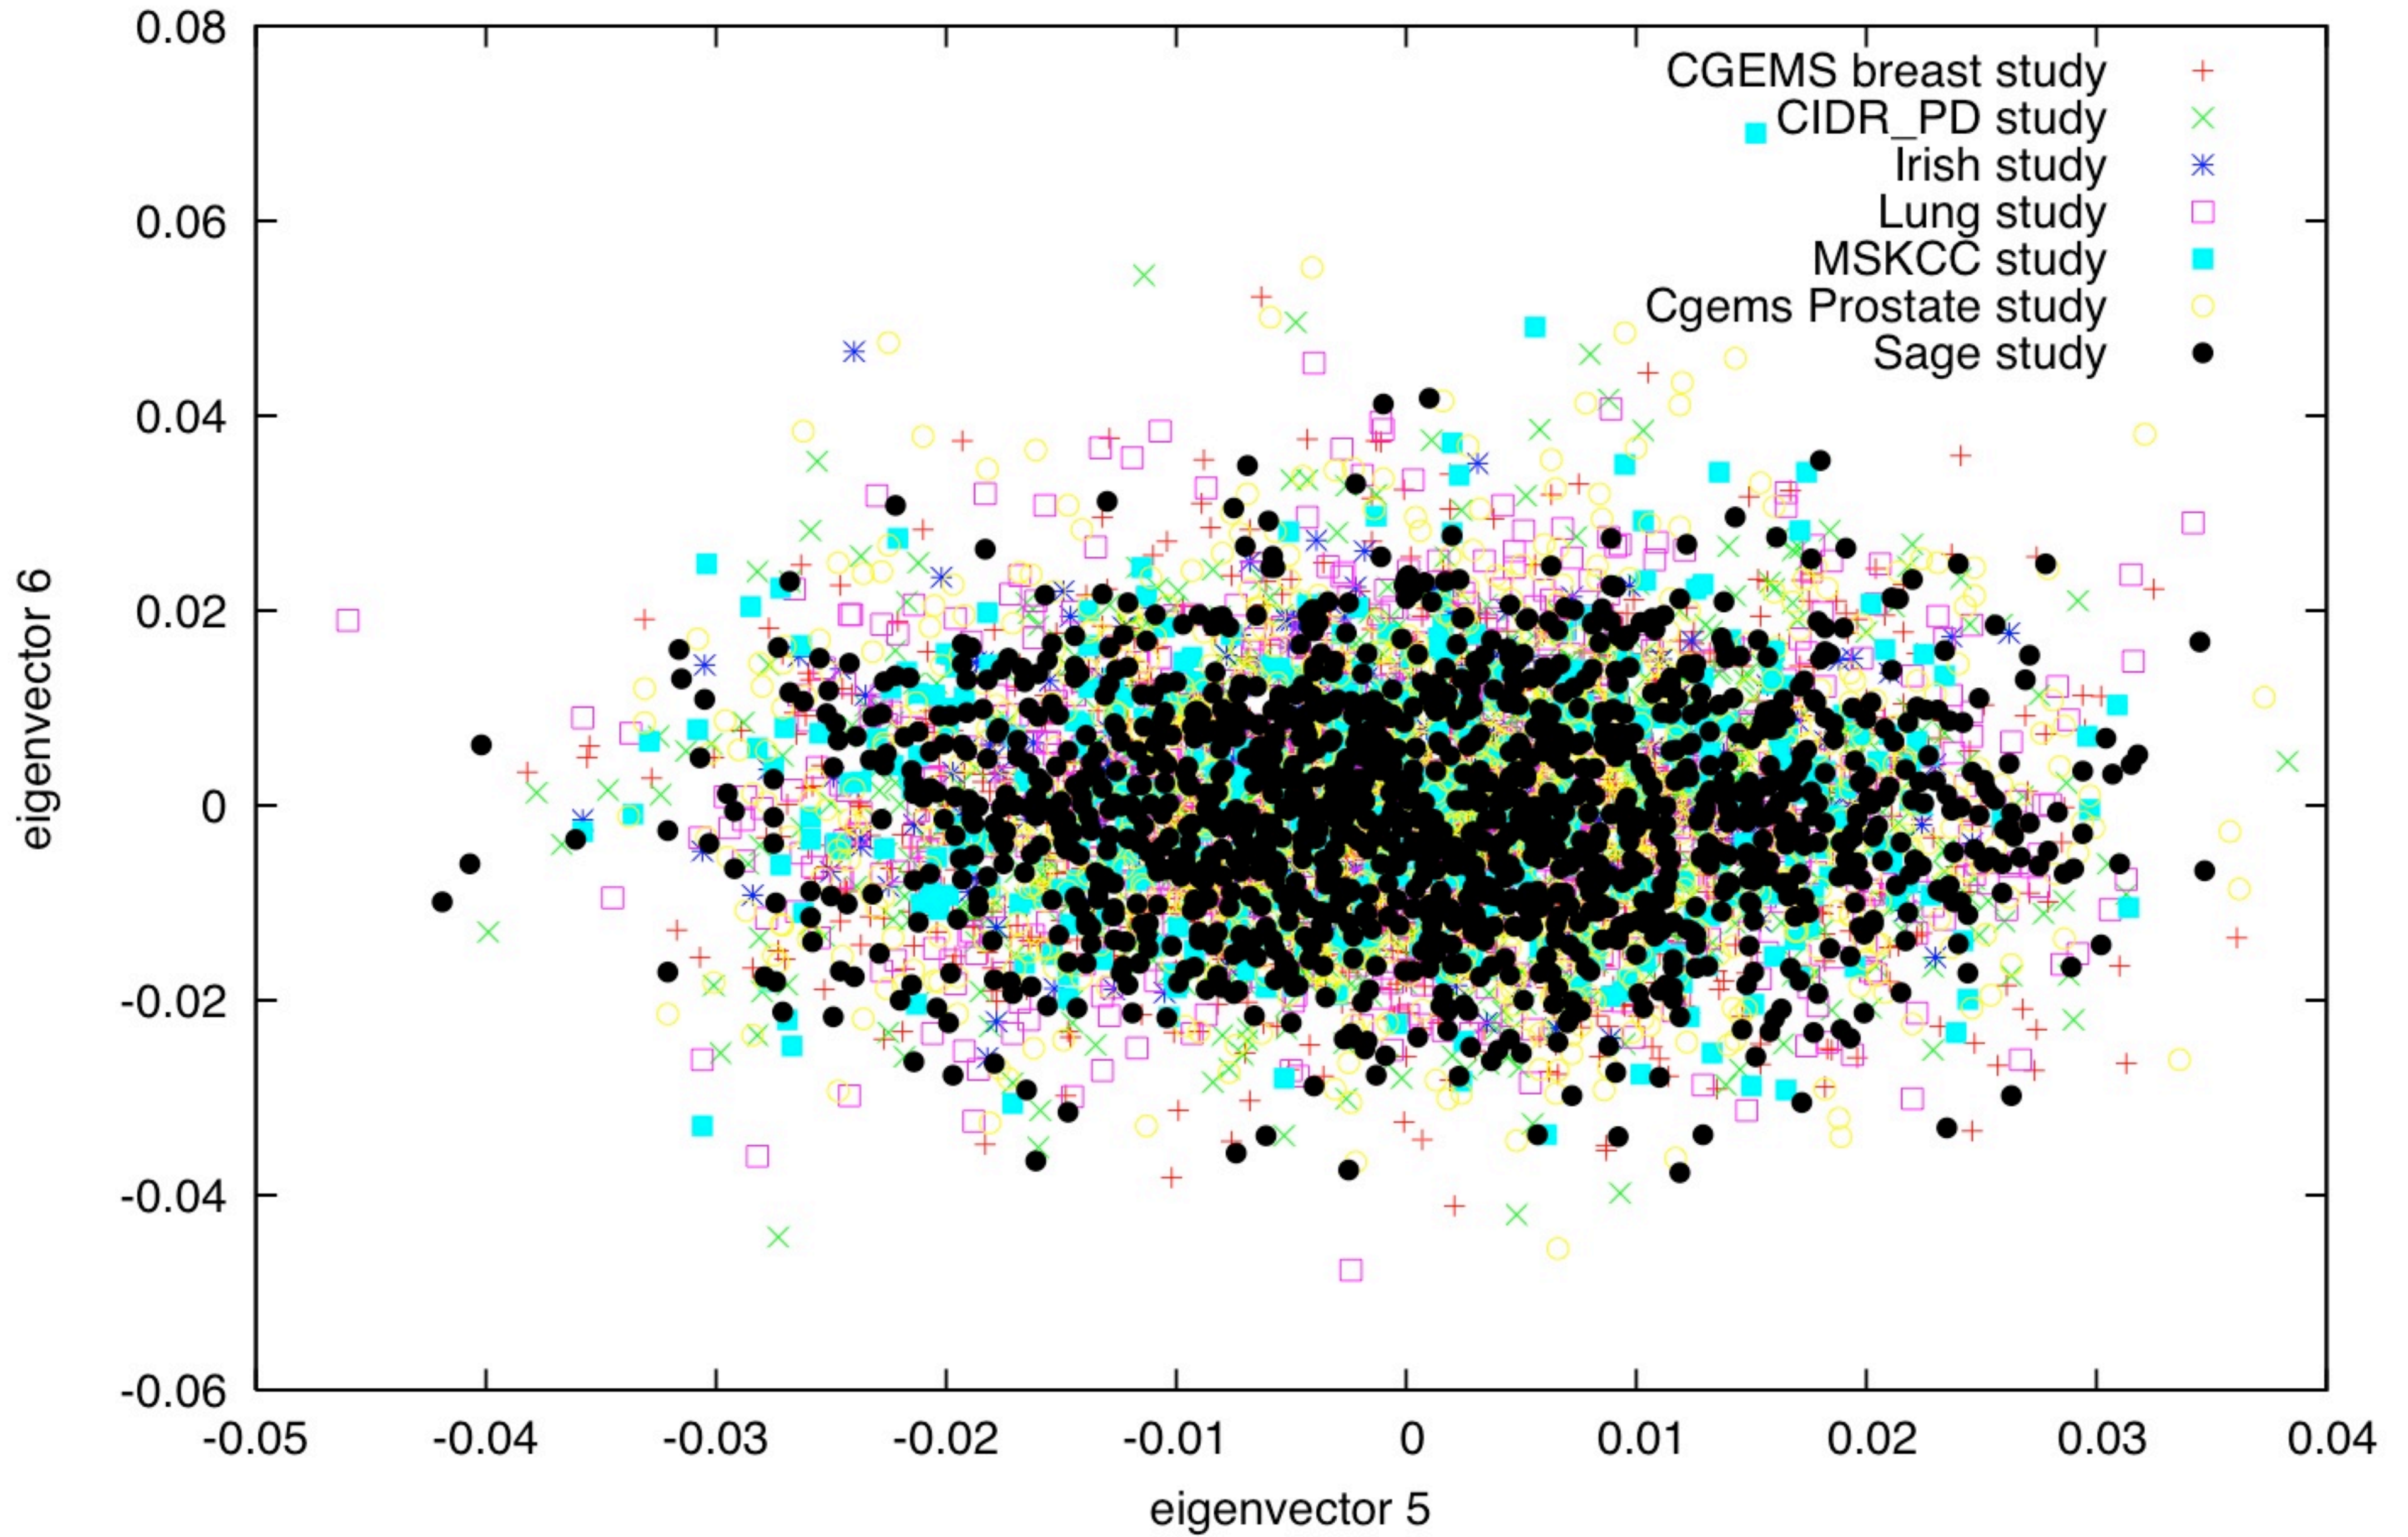



Pancreatic cases with controls from Publics database  
PCA plot: PC7 vs PC8

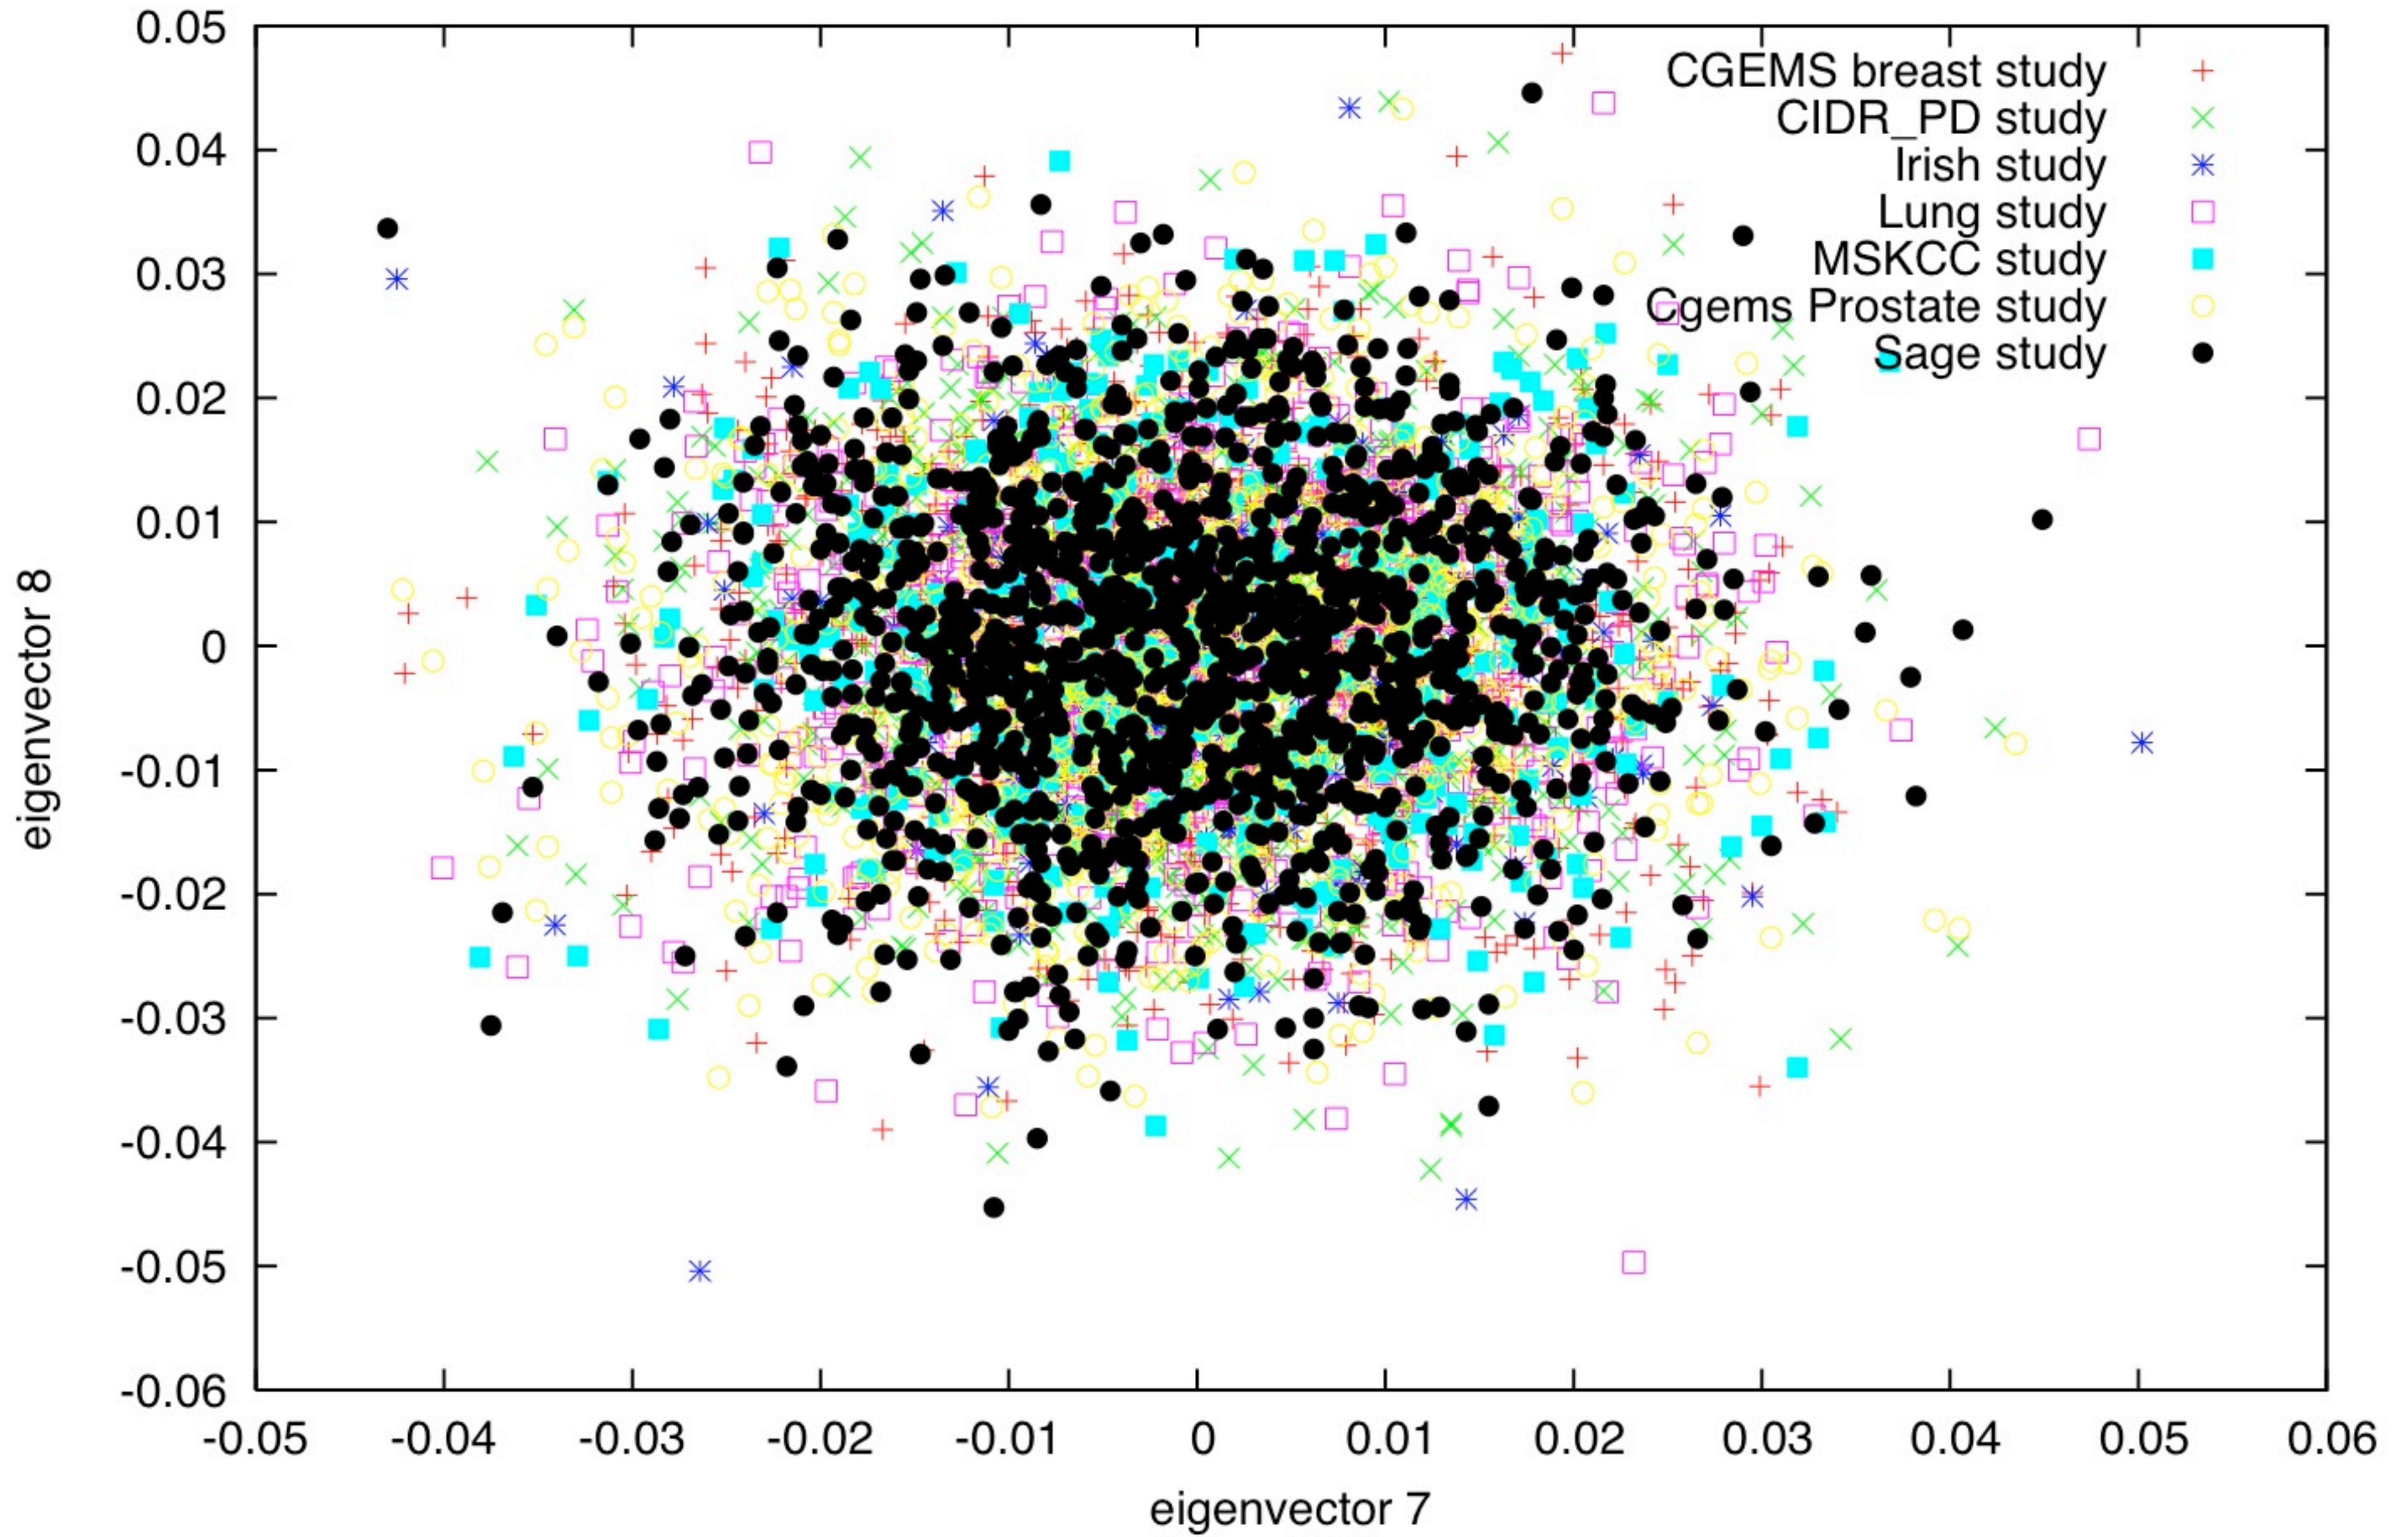



Pancreatic cases with controls from Publics database  
PCA plot: PC9 vs PC10

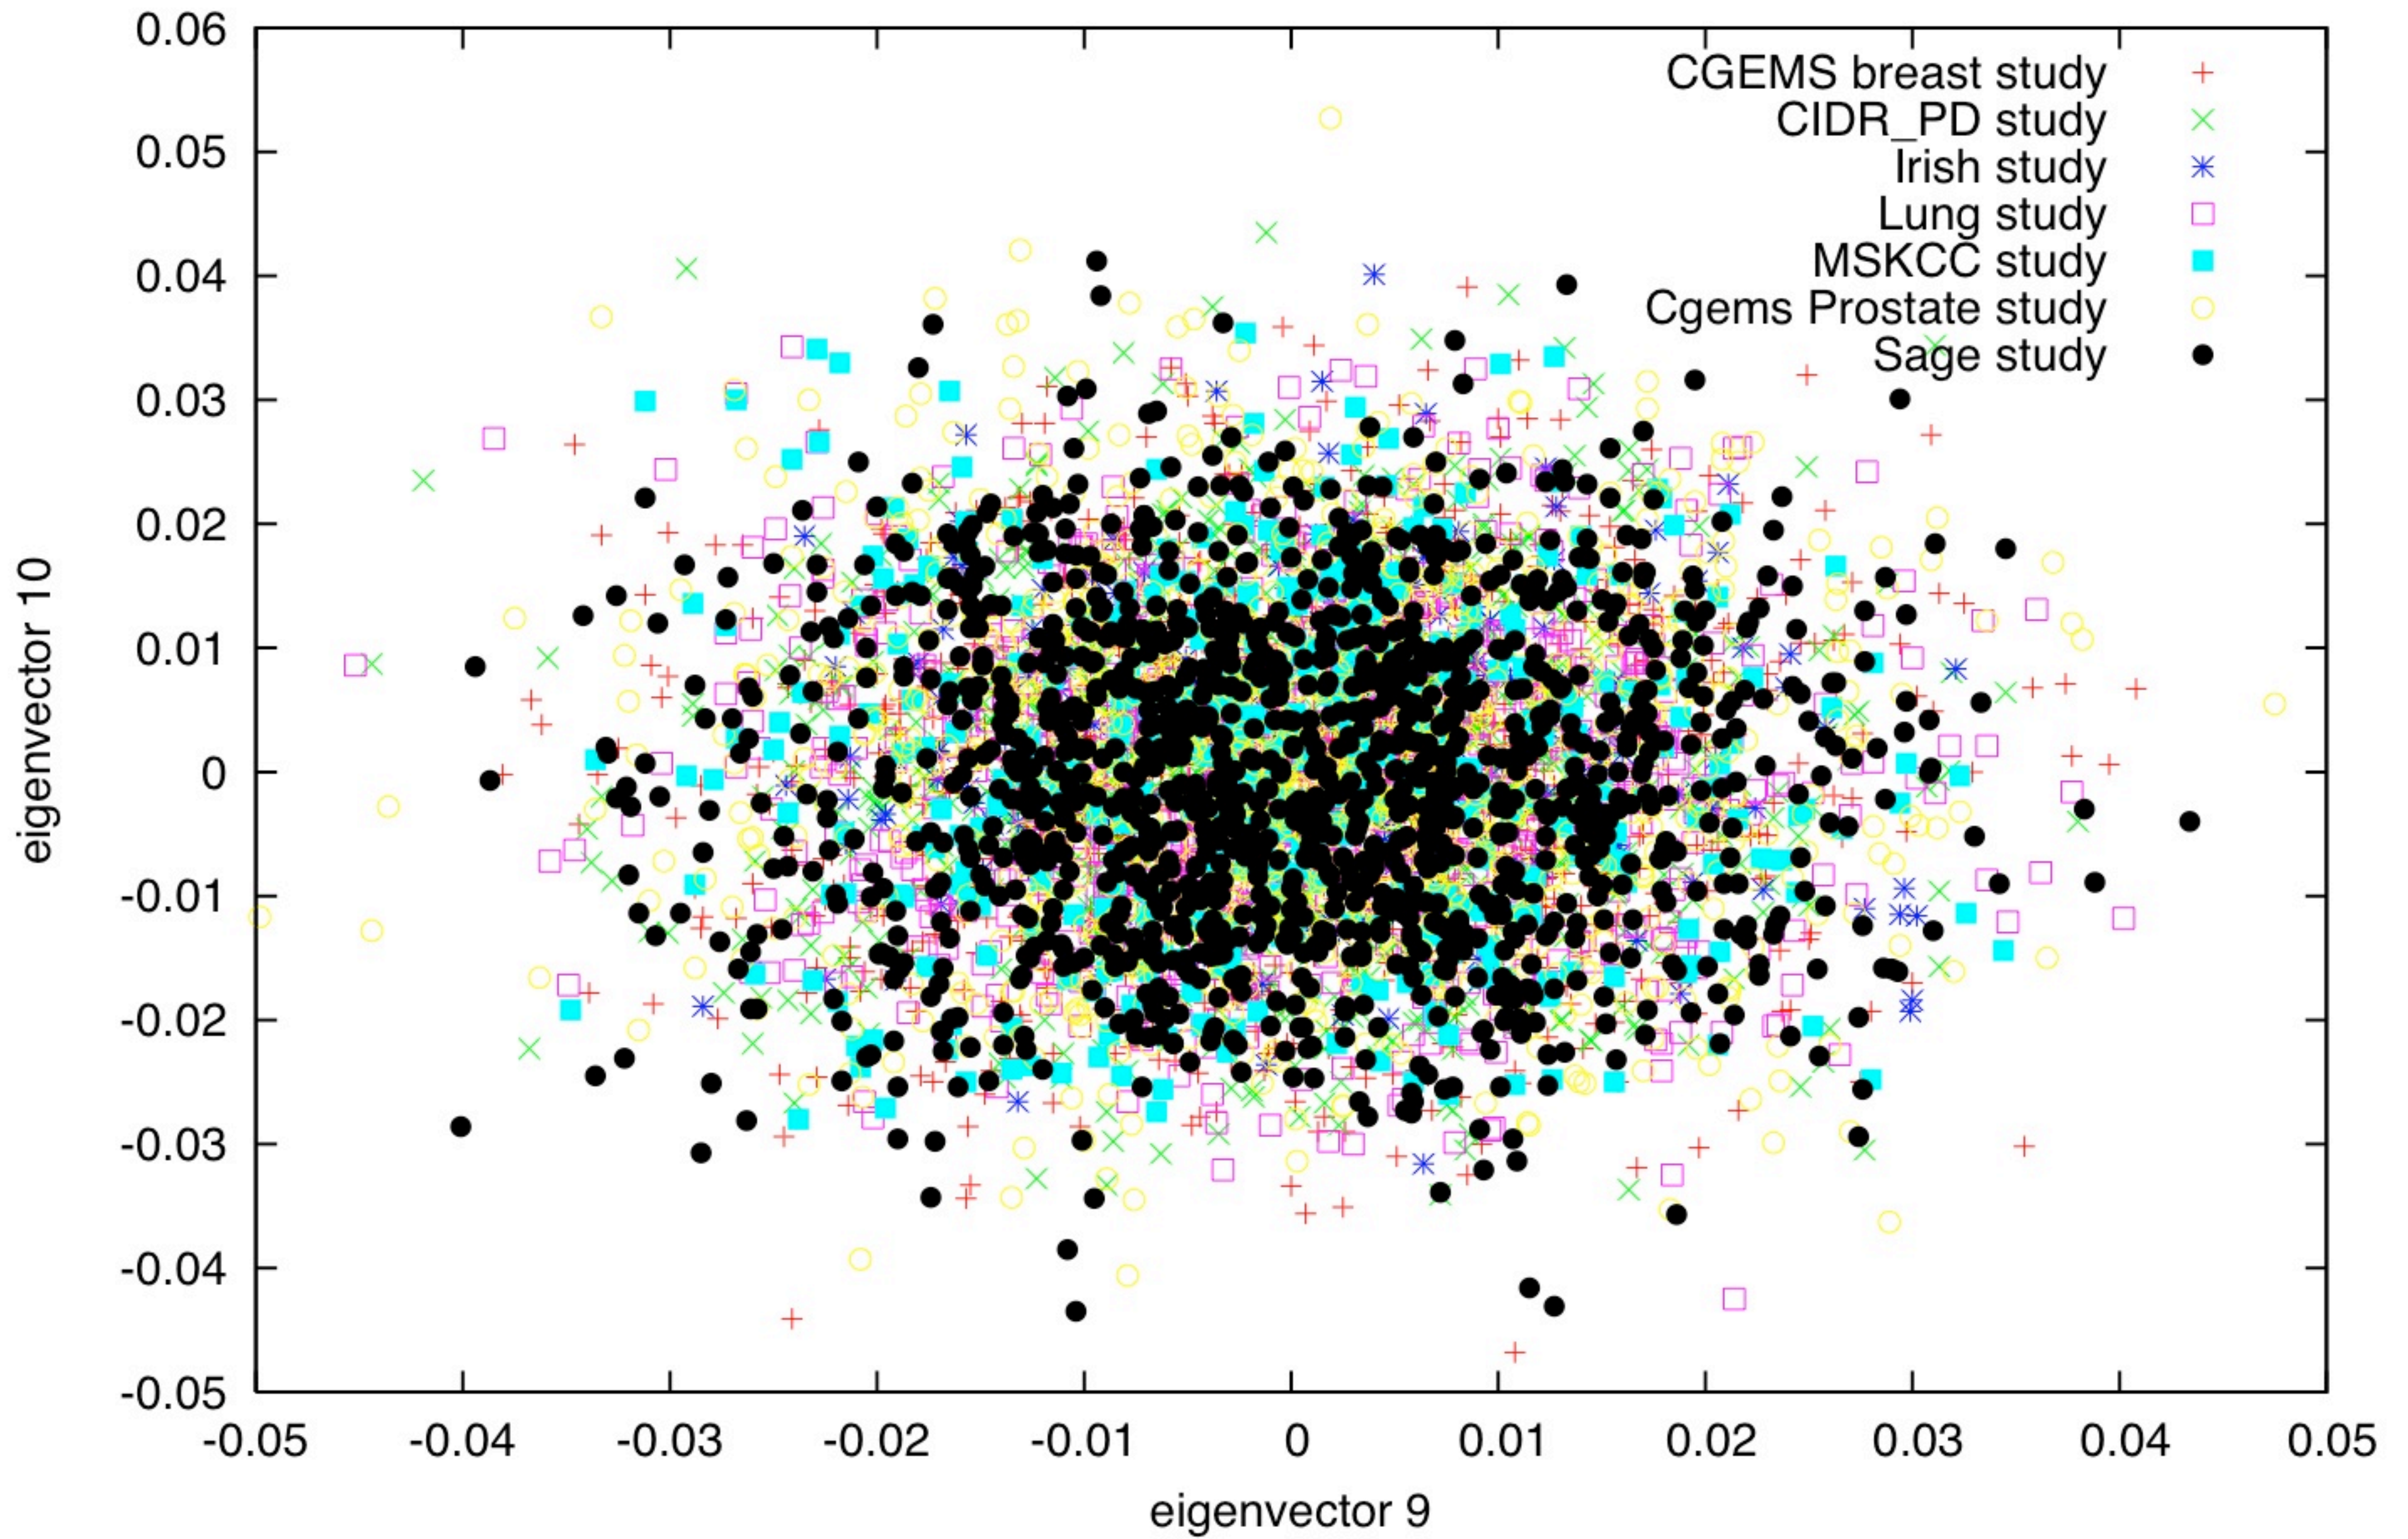



Pancreatic cases with controls from Publics database  
PCA plot: PC11 vs PC12

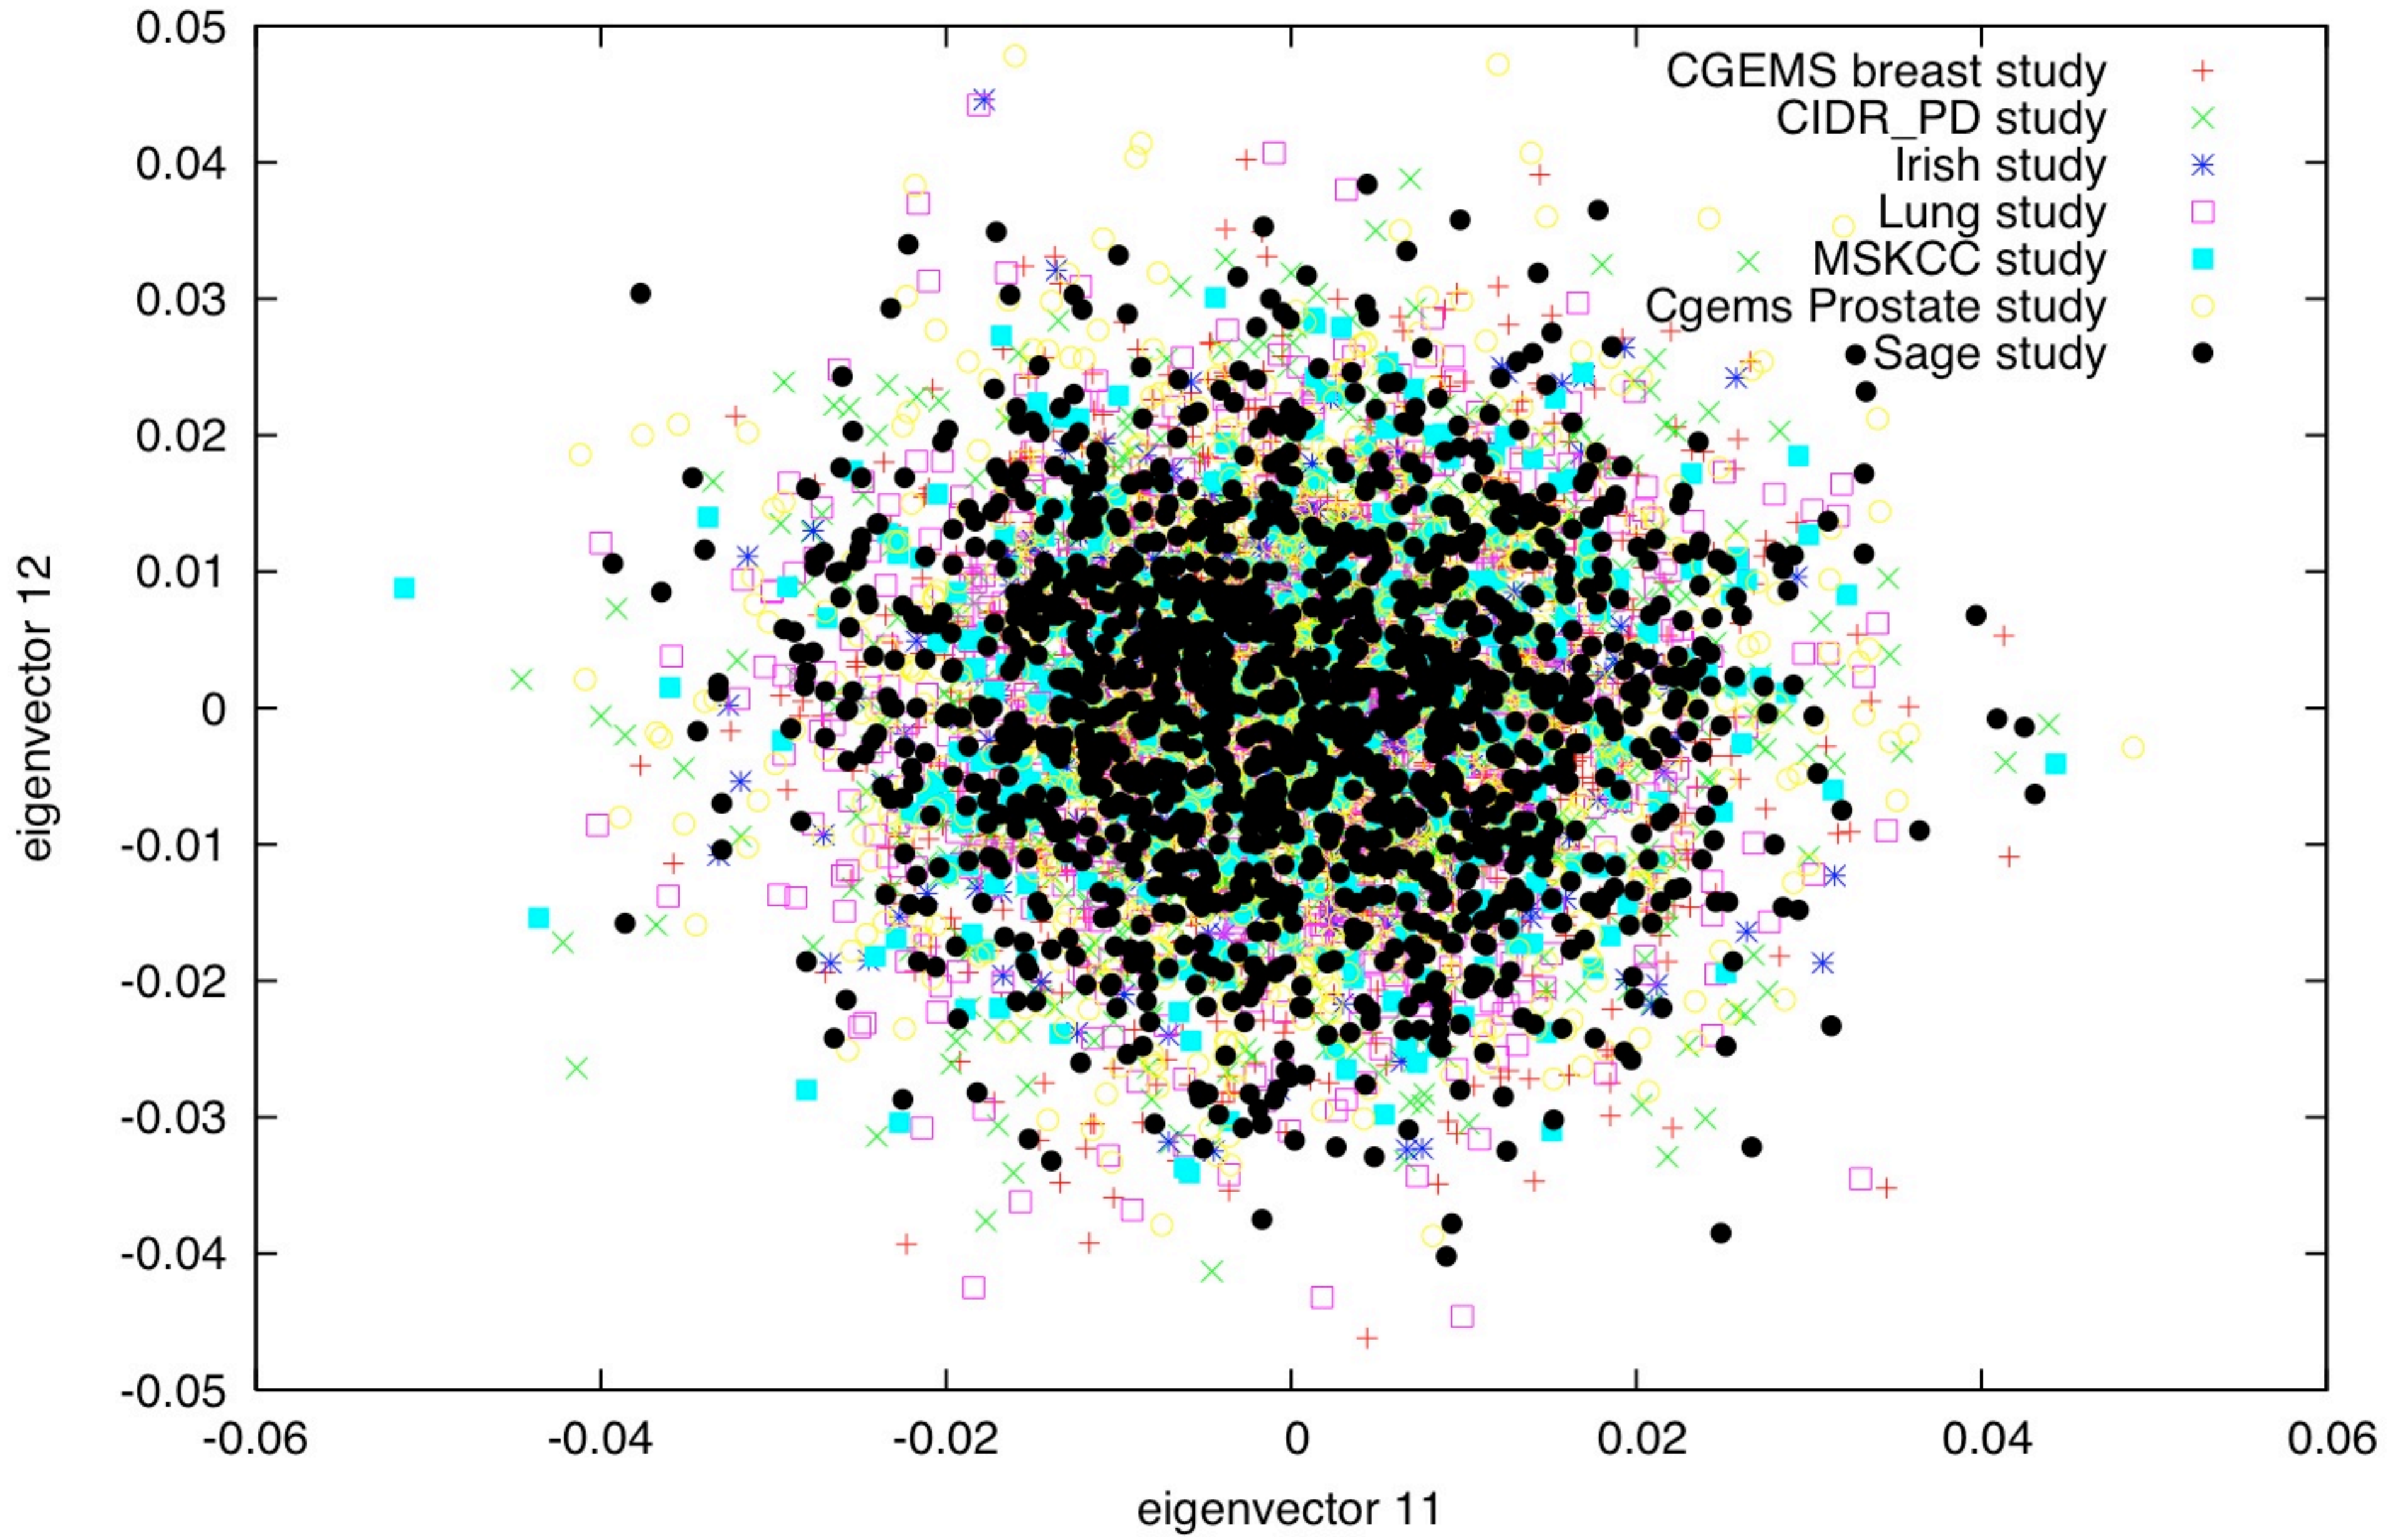



Pancreatic cases with controls from Publics database  
PCA plot: PC13 vs PC14

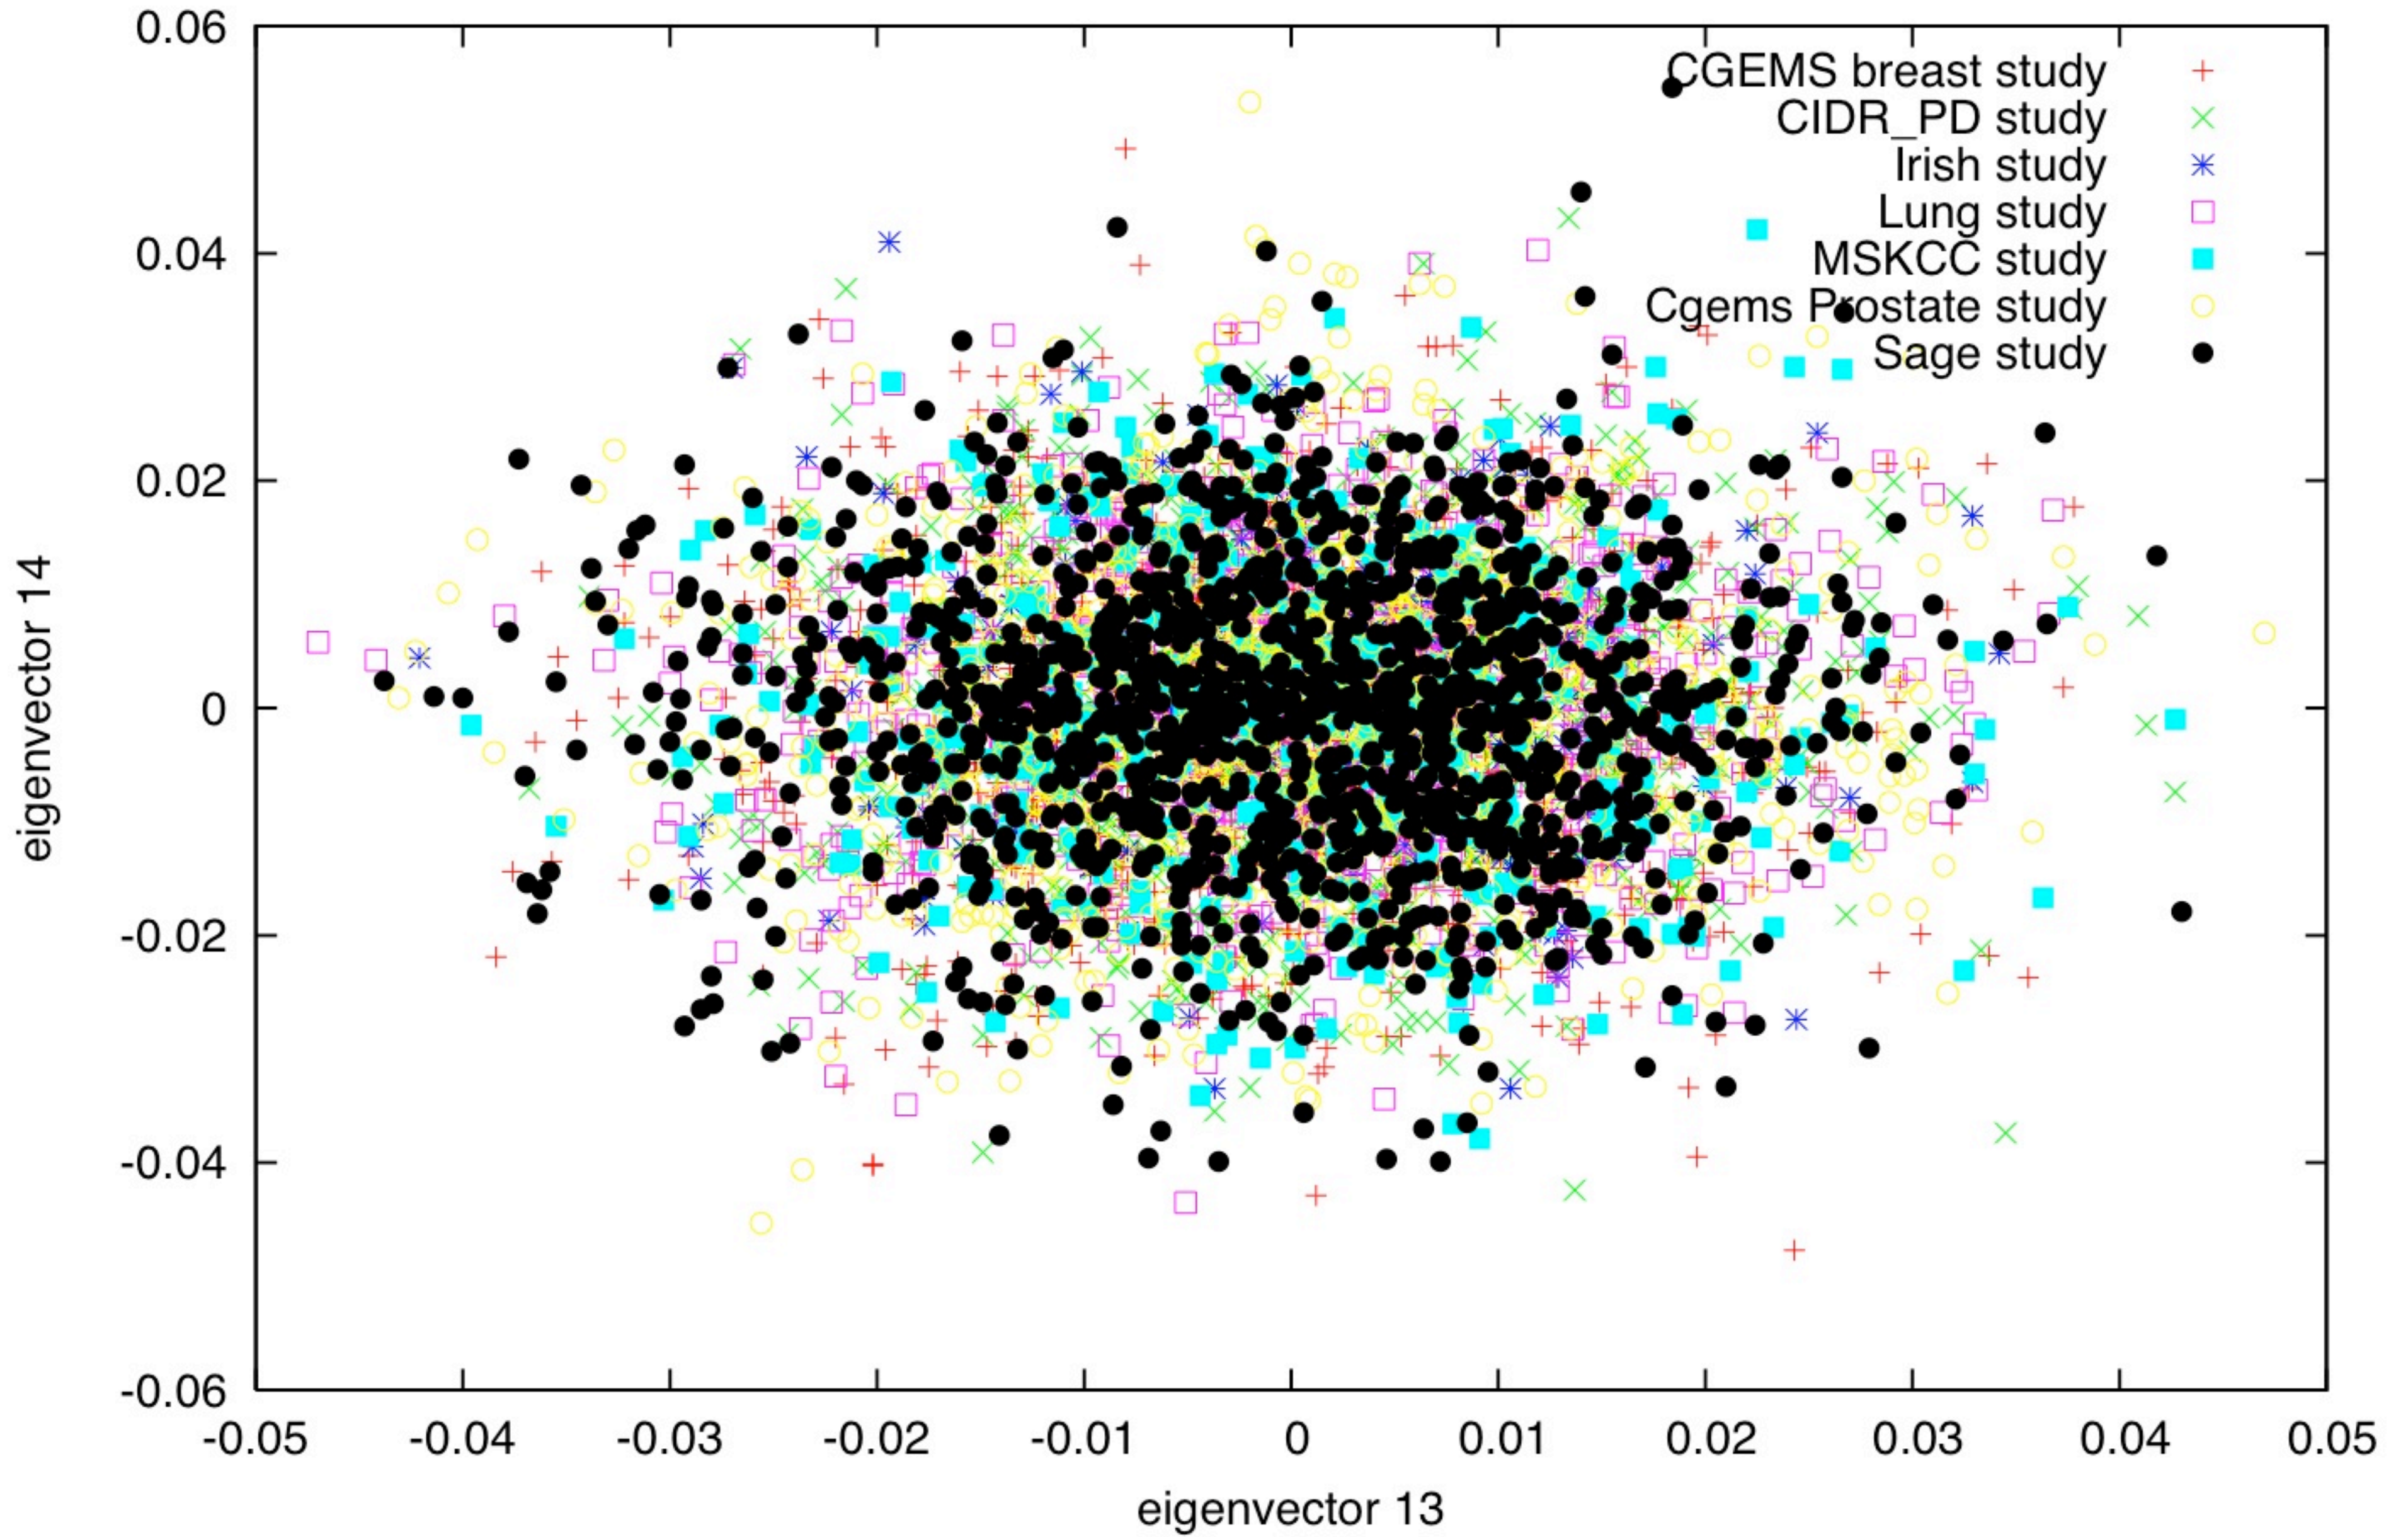



Pancreatic cases with controls from Publics database  
PCA plot: PC15 vs PC16

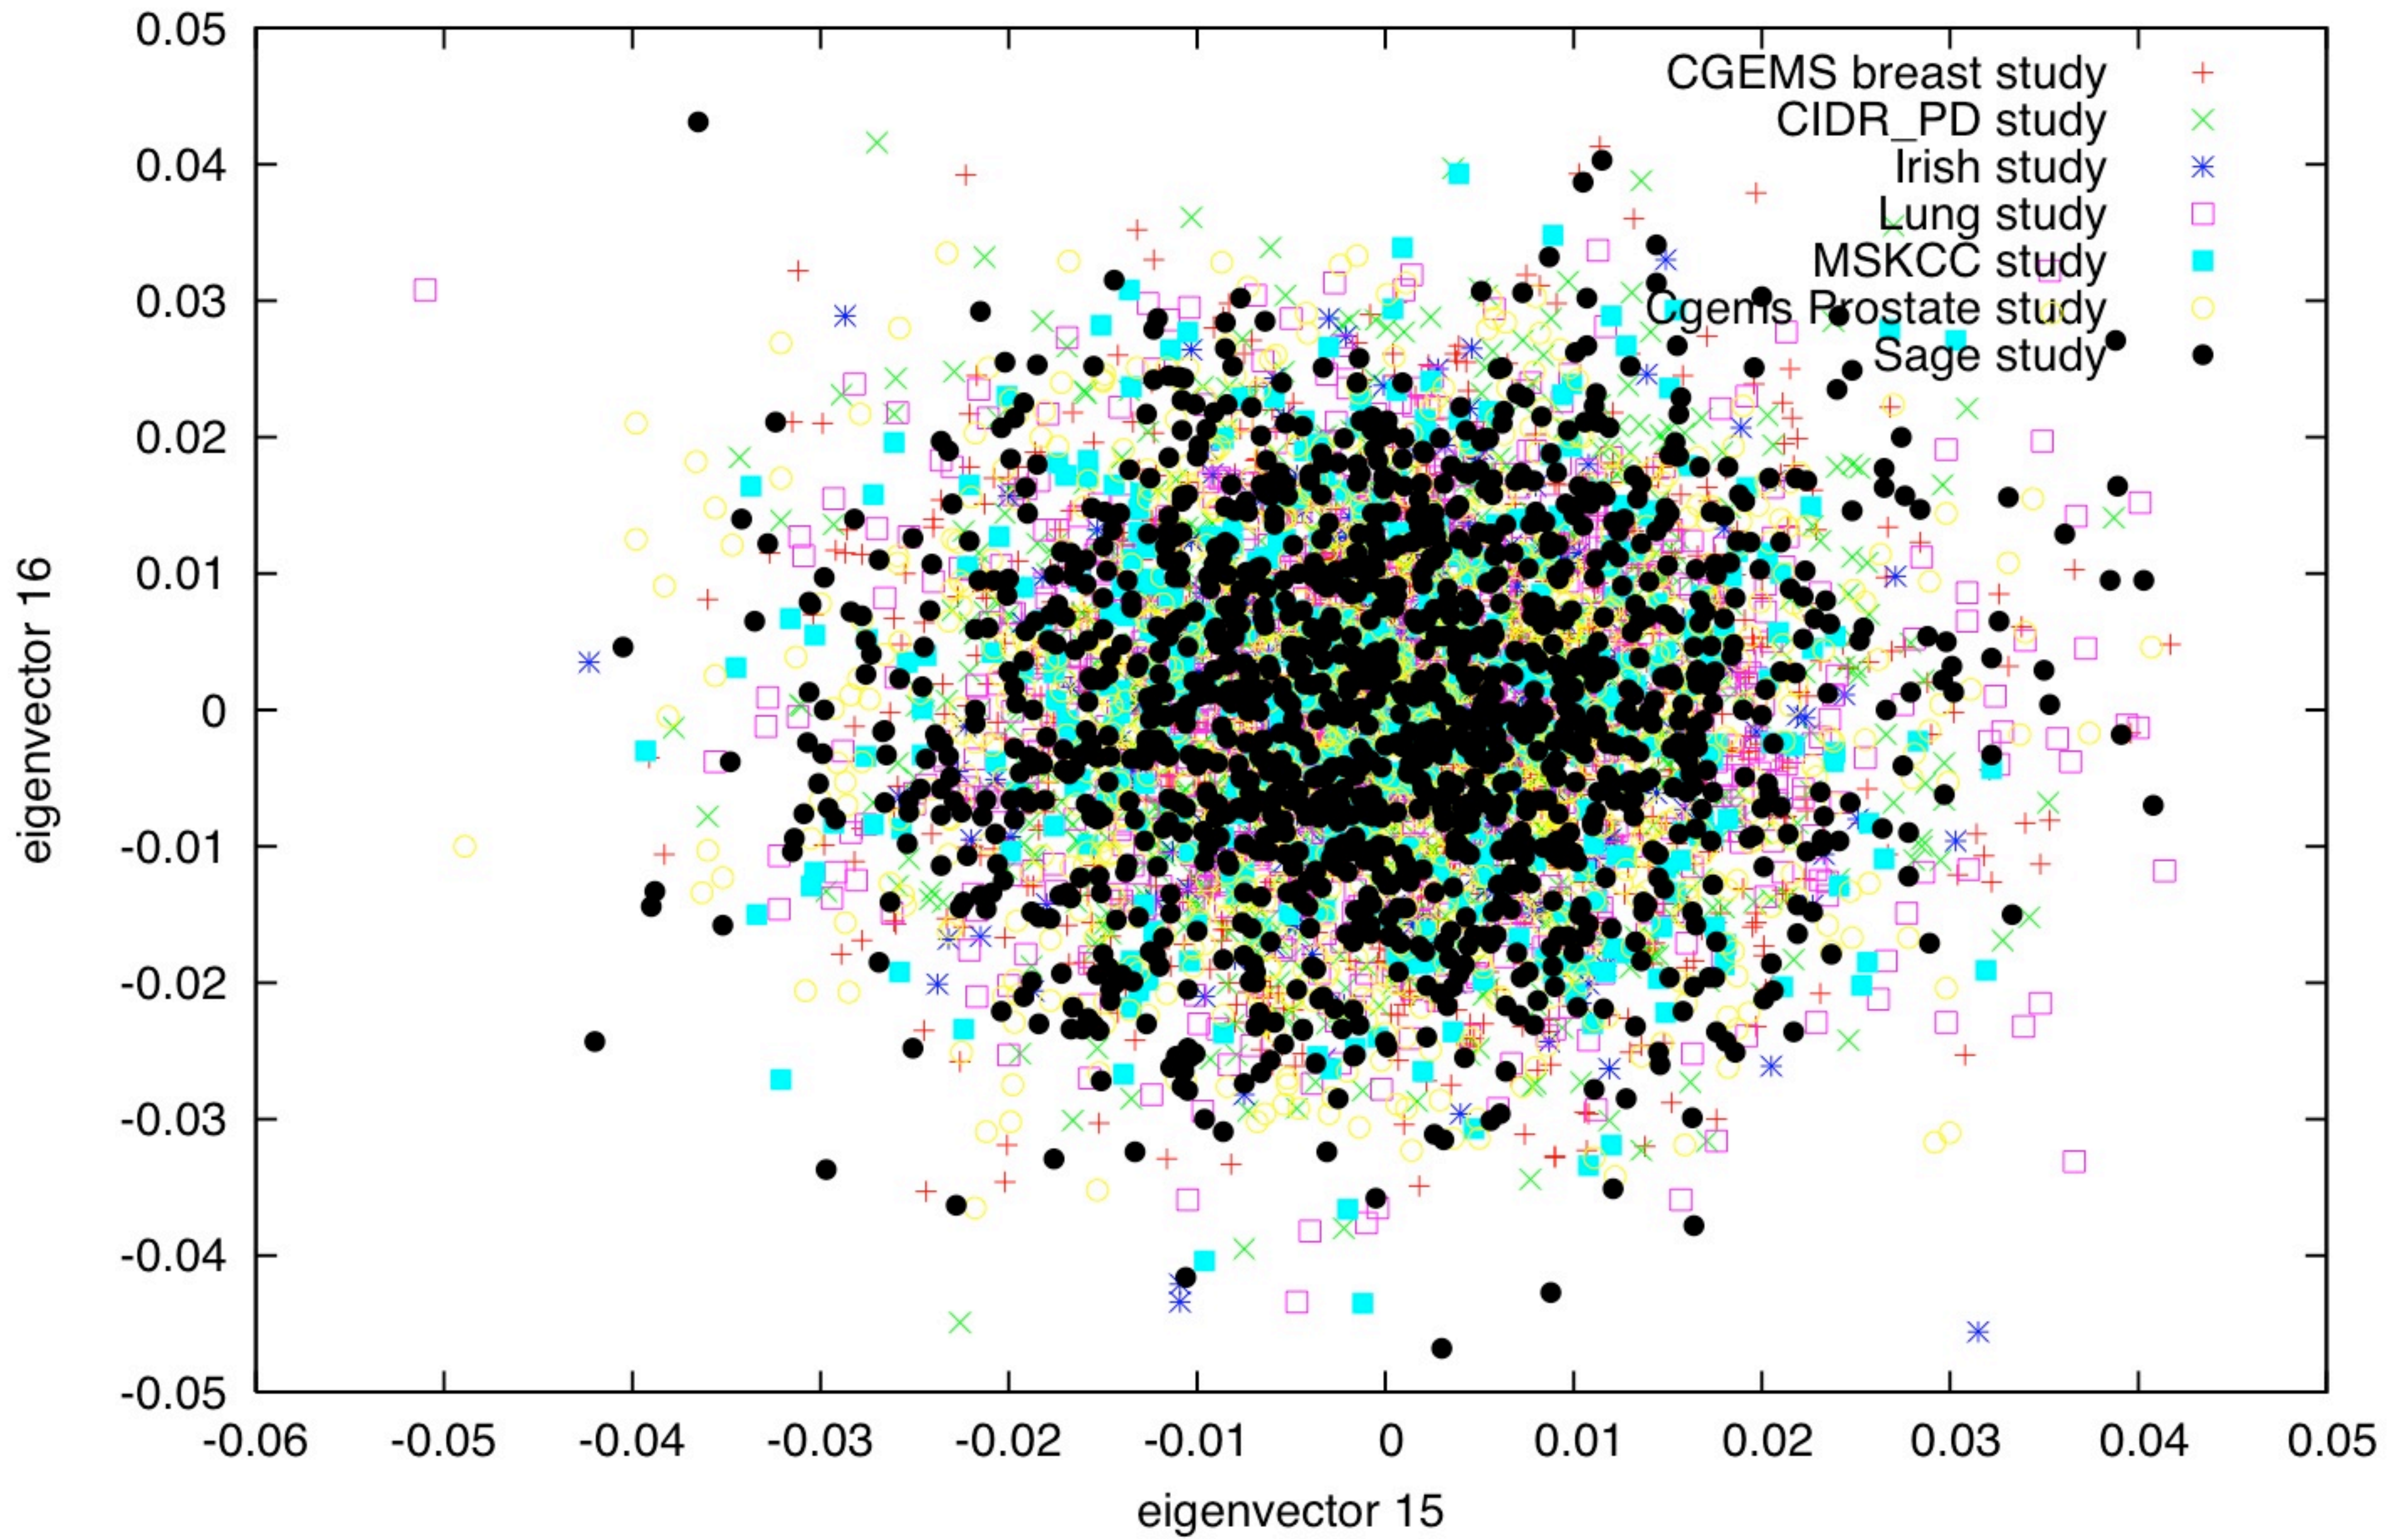



Pancreatic cases with controls from Publics database  
PCA plot: PC17 vs PC18

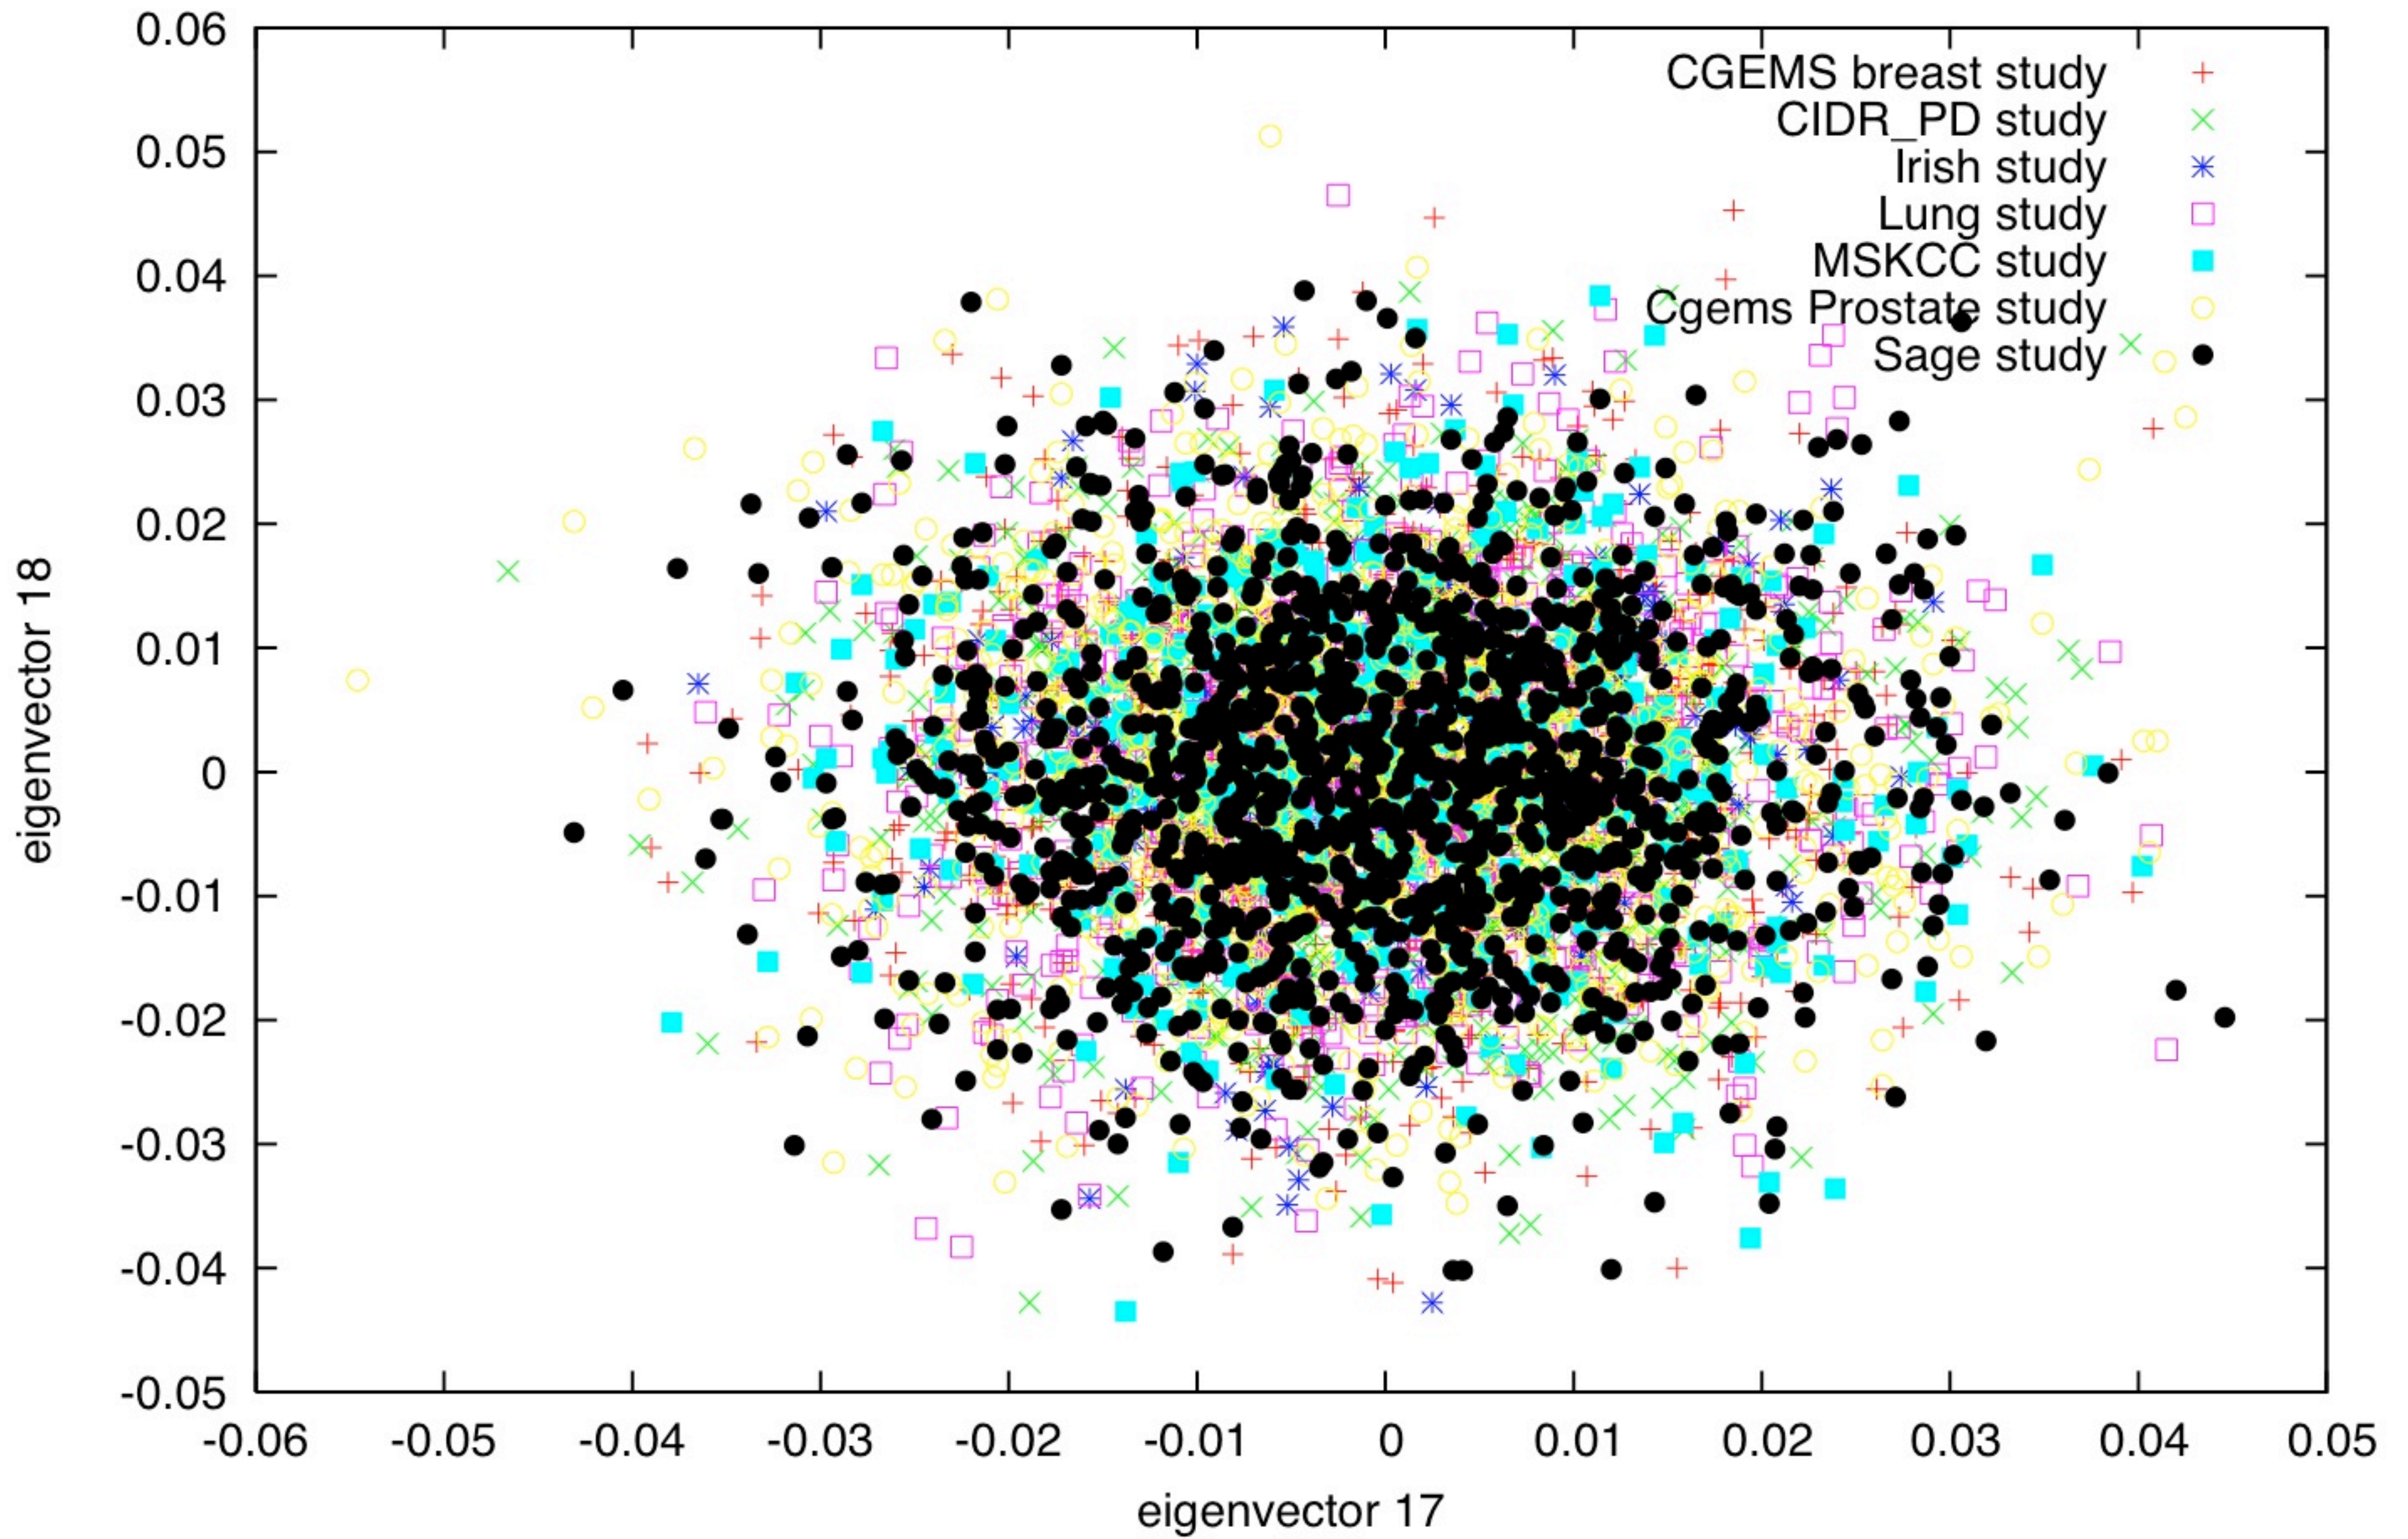



Pancreatic cases with controls from Publics database  
PCA plot: PC19 vs PC20

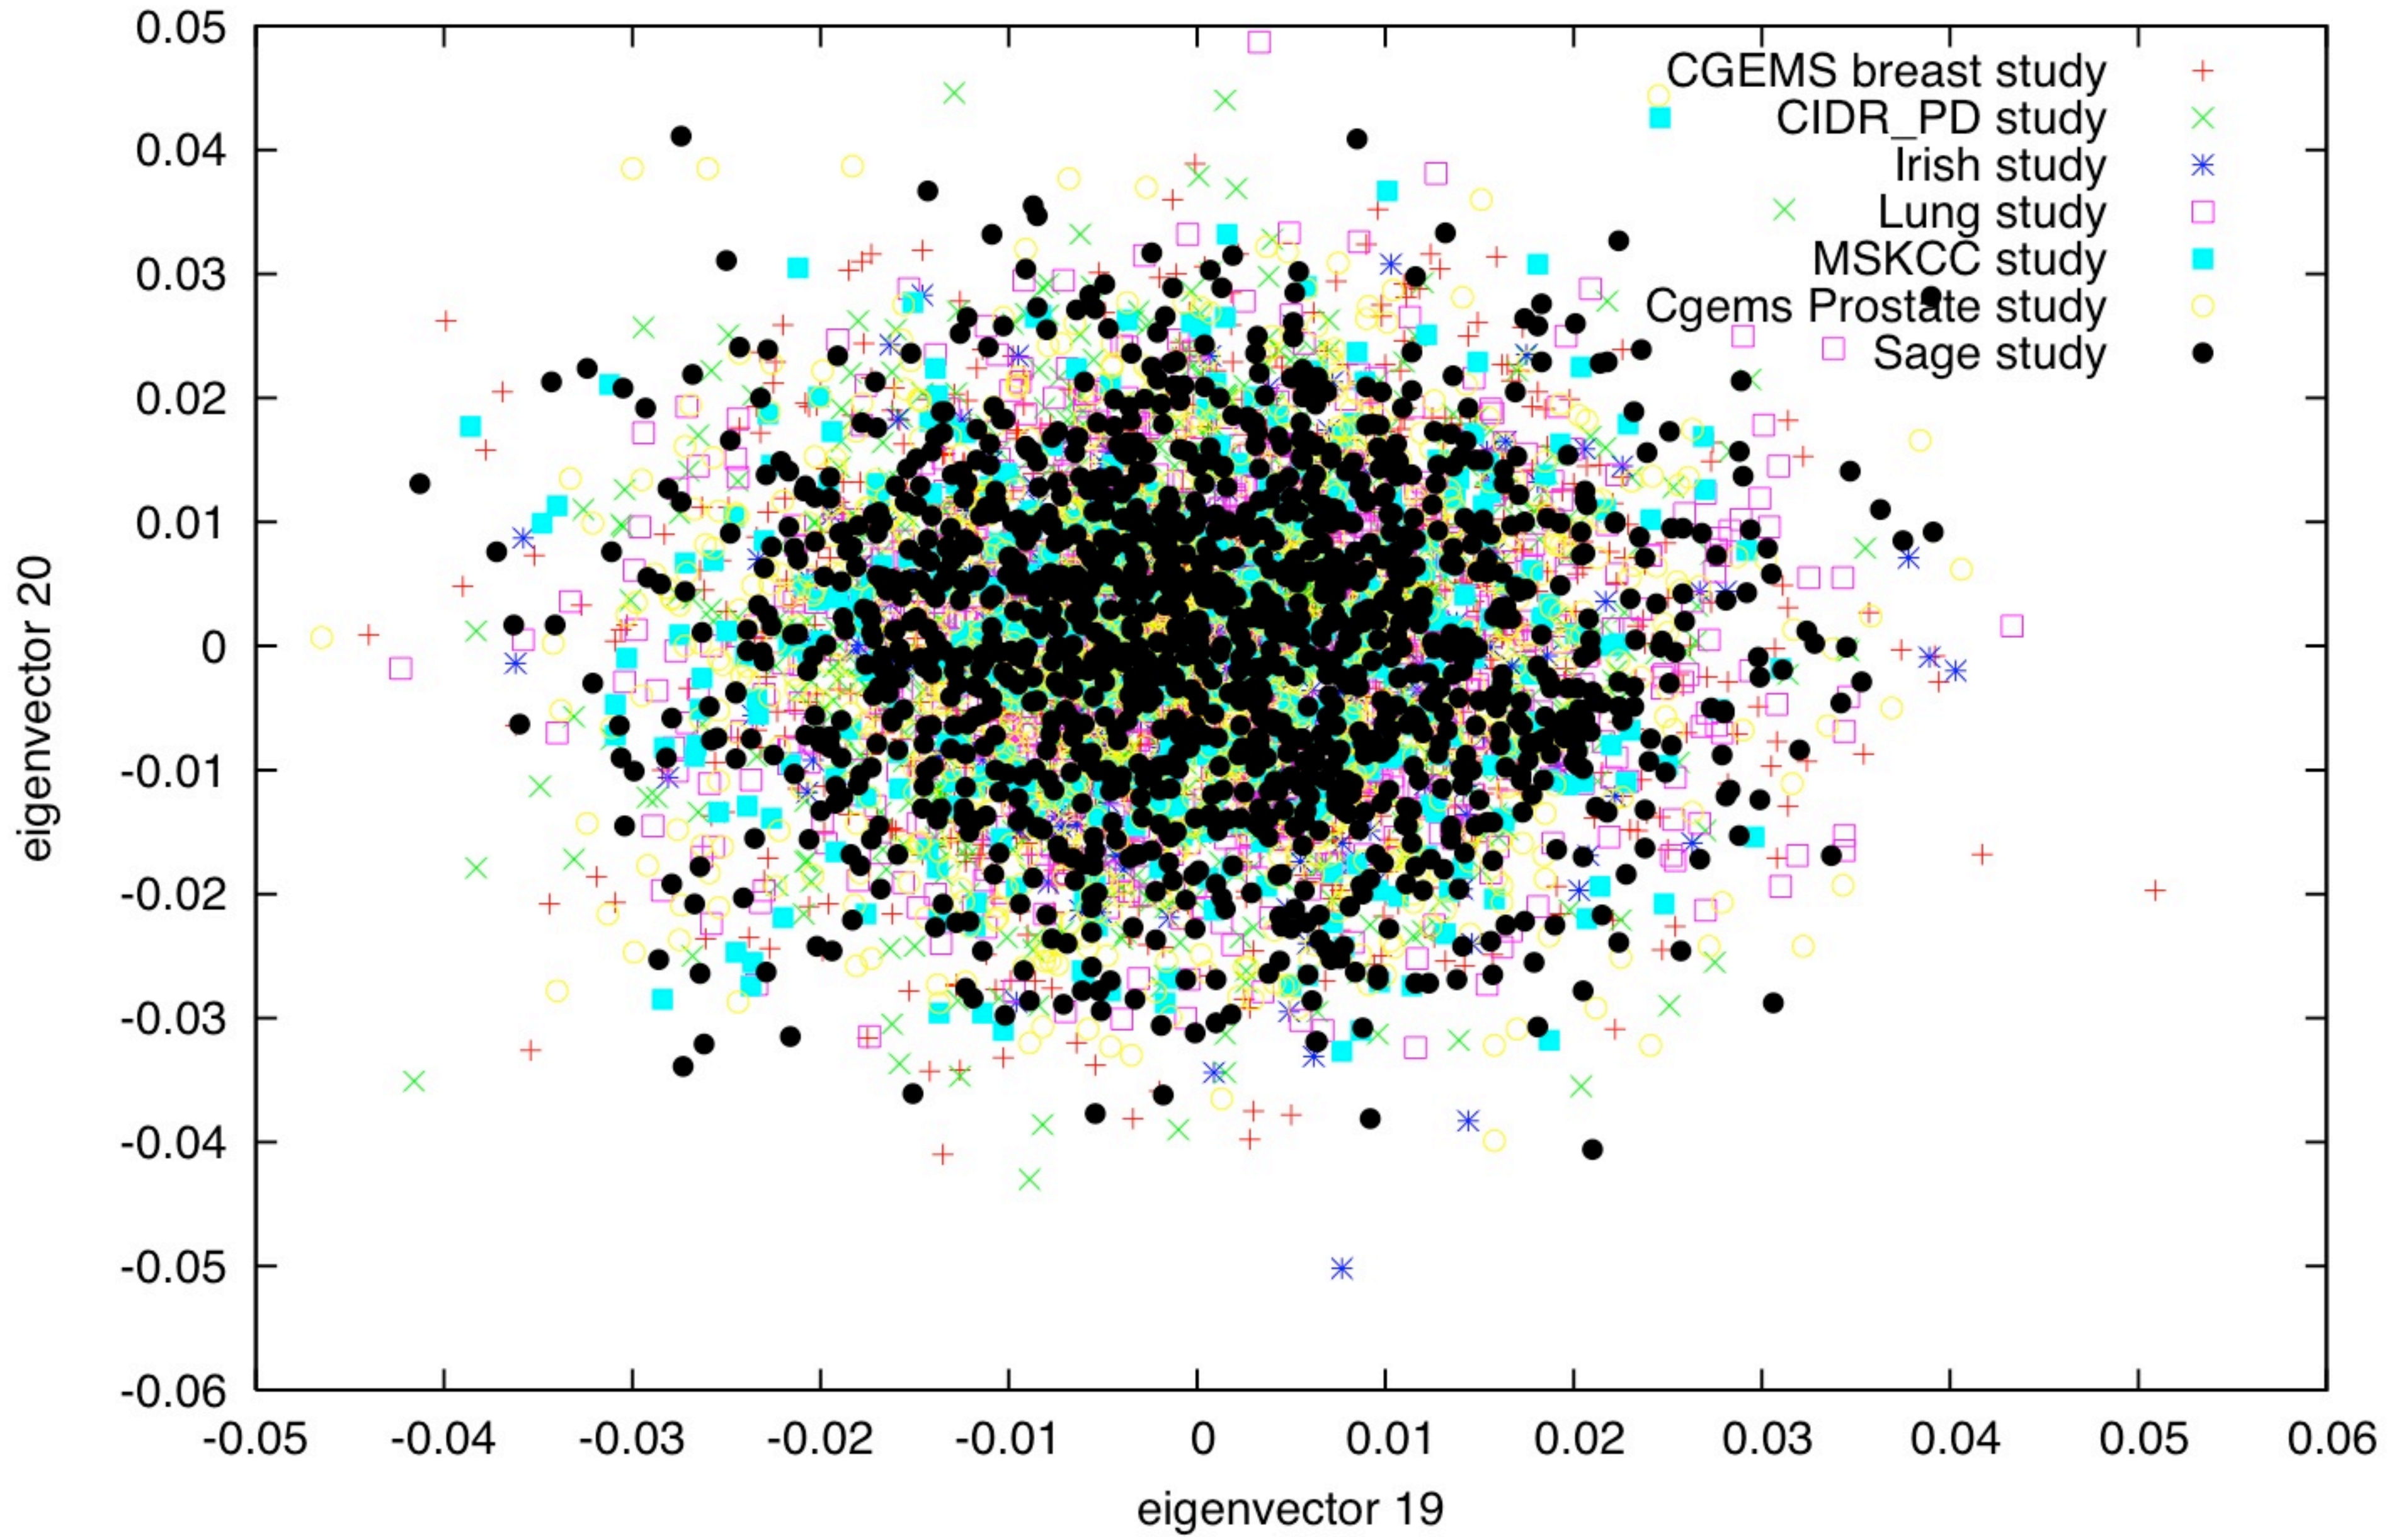

Supplement: hhe0072-0021-s02.pdf [file hhe0072-0021-s02.pdf]
