# Supplementary material
Source: PubMed Central journal article supplement (PMC3171281)

Supplemental Figure 3. Allele intensity scatter plot for rs1975920. Normalized probe intensity, as rederived from the log R ratio and B allele frequency, are shown for cases and controls genotyped using the Illumina CNV370-Duo and Illumina CNV370-Quad arrays.

**Normalized Cy3–Cy5 Probe Intensity: rs1975920**

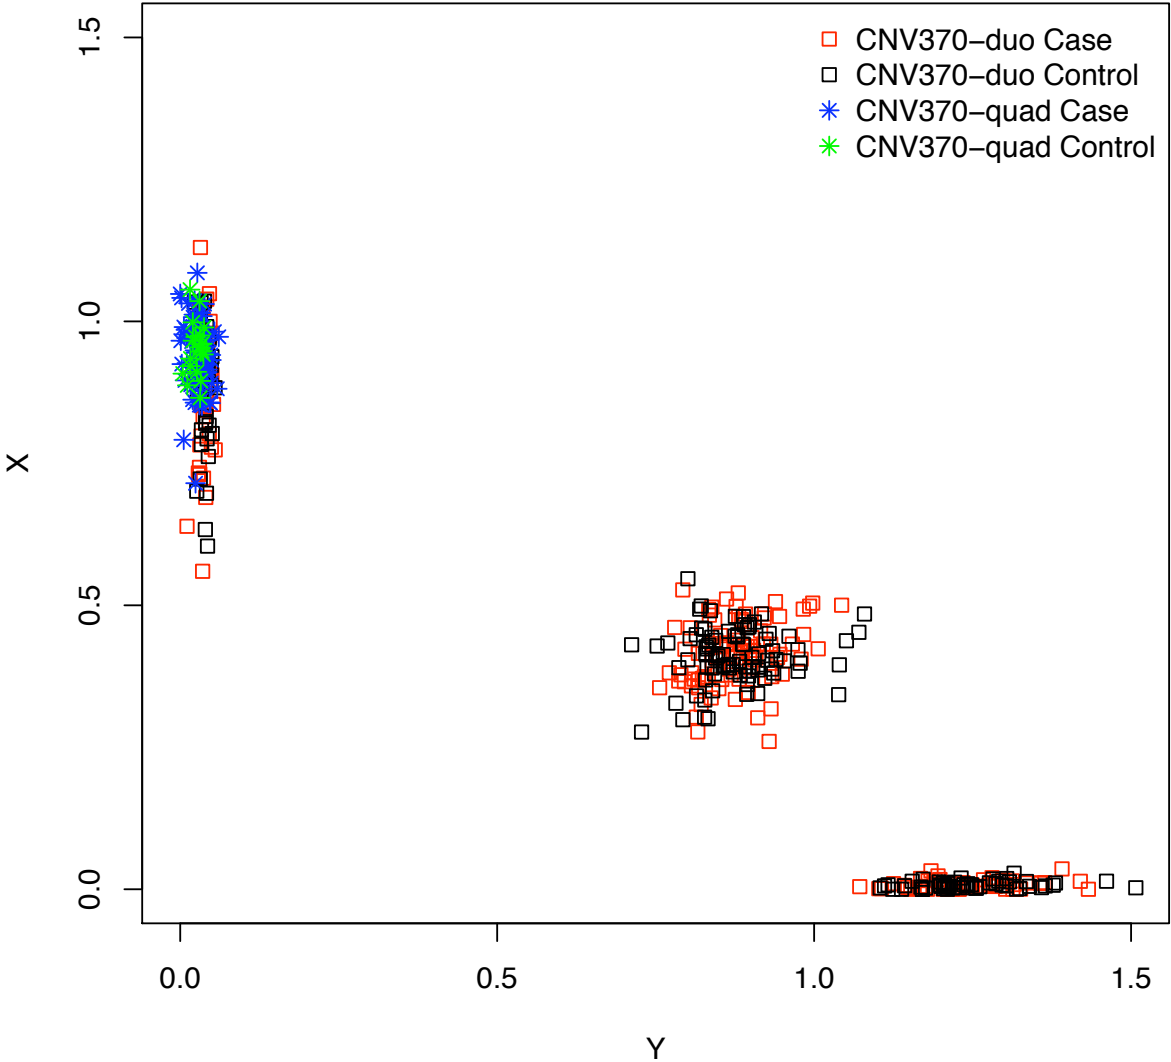

Supplement: hhe0072-0021-s03.pdf [file hhe0072-0021-s03.pdf]
